# Supplementary material for: Molecular Regulatory Mechanisms Underlying Leaf Color Transitions in Pyrus betulaefolia Bunge under High Light Intensity Stress
Source: Research Square preprint supplement (doi:10.21203/rs.3.rs-8489484/v1), 2026-01-07
Supplement: Supplementary file 1 [file a3f95fae9c8cf109cf75e8d5.xlsx]

## Sheet: Table S1
#Sample_ID	Total mapped	Multiple mapped	Uniquely mapped	Clean reads	Error rate(%)	Q20(%)	Q30(%)	GC content(%)
SXYN_1	48636545(90.18%)	2347478(4.35%)	46289067(85.83%)	53933974	0.0245	98.18	94.65	47.48
SXYN_2	43906940(89.71%)	2184647(4.46%)	41722293(85.24%)	48944746	0.0247	98.1	94.52	47.65
SXYN_3	50354328(88.69%)	2657749(4.68%)	47696579(84.01%)	56777608	0.0241	98.34	95.08	47.81
SXYY_1	40847386(87.12%)	2310509(4.93%)	38536877(82.19%)	46888002	0.024	98.39	95.23	47.81
SXYY_2	40789071(85.55%)	2698545(5.66%)	38090526(79.89%)	47679822	0.024	98.39	95.21	48.46
SXYY_3	44219157(87.53%)	2648777(5.24%)	41570380(82.29%)	50517560	0.0244	98.22	94.77	48.29
ZSXH4_1	45936075(88.86%)	2333208(4.51%)	43602867(84.35%)	51693178	0.0243	98.26	94.89	47.69
ZSXH4_2	42503539(88.33%)	2408996(5.01%)	40094543(83.32%)	48121456	0.0241	98.37	95.14	47.8
ZSXH4_3	49565238(89.41%)	2446366(4.41%)	47118872(84.99%)	55437788	0.0243	98.27	94.92	47.51
ZSXL_1	40785165(89.3%)	2057887(4.51%)	38727278(84.79%)	45672612	0.0247	98.12	94.53	47.28
ZSXL_2	41902646(88.61%)	2409965(5.1%)	39492681(83.52%)	47287142	0.0241	98.34	95.08	47.49
ZSXL_3	40996045(87.65%)	2597707(5.55%)	38398338(82.1%)	46770138	0.0241	98.34	95.1	47.51

## Sheet: Table S2
category	ID	term	count	adj_pval	zscore	up	down	color	color2	gene_list
BP	GO:0044271	cellular nitrogen compound biosynthetic process	195	0.00042416	11.243	176	19	#F70700	#D0B8B8	Chr5.g07615;Chr1.g57407;Chr12.g36260;Chr17.g24825;Chr13.g23676;Chr14.g48156;Chr8.g54753;Chr14.g47980;Chr3.g19921;Chr6.g52525;Chr8.g55711;Chr3.g20012;Chr4.g38806;Chr2.g42878;Chr6.g51446;Chr5.g06331;Chr16.g29638;Chr13.g22924;Chr11.g11008;Scaffold7.g27975;Chr2.g42809;Chr9.g46806;Chr1.g57477;Chr17.g26020;Chr15.g00164;Chr12.g34970;Chr16.g29256;Chr6.g50949;Chr10.g14355;Chr10.g14831;Chr11.g12680;Chr17.g…
BP	GO:0034645	cellular macromolecule biosynthetic process	185	0.00042416	10.6606	165	20	#EE1000	#ED4545	Chr2.g42636;Chr5.g07615;Chr1.g57407;Chr12.g36260;Chr17.g25594;Chr17.g24825;Chr8.g53837;Chr13.g23676;Chr1.g57387;Chr8.g54753;Chr14.g47980;Chr3.g19921;Chr6.g52525;Chr5.g09320;Chr8.g55711;Chr3.g20012;Chr4.g38806;Chr2.g42878;Chr5.g06331;Chr15.g01400;Chr13.g22924;Scaffold6.g21075;Chr2.g42809;Chr9.g46806;Chr15.g03949;Chr1.g57477;Chr14.g47809;Chr7.g34102;Chr7.g31944;Chr11.g13042;Chr16.g29256;Chr6.g50949…
BP	GO:1901566	organonitrogen compound biosynthetic process	192	0.00042416	10.5366	169	23	#EB1300	#F32C2C	Chr15.g00535;Chr1.g57407;Chr14.g48663;Chr17.g24825;Chr4.g39864;Chr13.g23676;Chr14.g48156;Chr8.g54753;Chr14.g47980;Chr3.g19921;Chr13.g24415;Chr8.g55711;Chr3.g20012;Chr4.g38806;Chr2.g42878;Chr6.g51446;Chr3.g19602;Chr5.g06331;Chr16.g29638;Chr13.g22924;Chr11.g11008;Scaffold7.g27975;Chr9.g46806;Chr1.g57477;Chr17.g26020;Chr7.g31944;Chr12.g34970;Chr16.g29256;Chr6.g50949;Chr10.g14831;Chr11.g12680;Chr17.g…
BP	GO:0043604	amide biosynthetic process	126	0.00042416	10.3341	121	5	#E91500	#F91717	Chr1.g57407;Chr17.g24825;Chr13.g23676;Chr14.g48156;Chr8.g54753;Chr14.g47980;Chr3.g19921;Chr8.g55711;Chr3.g20012;Chr4.g38806;Chr5.g08802;Chr5.g06331;Chr13.g22924;Chr9.g46806;Chr1.g57477;Chr7.g31944;Chr16.g29256;Chr6.g50949;Chr10.g15203;Chr13.g22497;Chr1.g56449;Chr9.g46955;Chr10.g14475;Chr10.g15380;Chr11.g10816;Chr3.g17611;Chr4.g38612;Chr5.g08702;Chr16.g30578;Chr2.g41190;Chr3.g17595;Chr3.g17619;Chr…
BP	GO:0043043	peptide biosynthetic process	123	0.00042416	10.1889	118	5	#E61800	#F81919	Chr1.g57407;Chr17.g24825;Chr13.g23676;Chr14.g48156;Chr8.g54753;Chr14.g47980;Chr3.g19921;Chr8.g55711;Chr3.g20012;Chr4.g38806;Chr2.g42878;Chr5.g06331;Chr13.g22924;Chr9.g46806;Chr1.g57477;Chr7.g31944;Chr16.g29256;Chr6.g50949;Chr10.g15203;Chr13.g22497;Chr1.g56449;Chr9.g46955;Chr10.g14475;Chr10.g15380;Chr11.g10816;Chr3.g17611;Chr4.g38612;Chr13.g22380;Chr16.g30578;Chr2.g41190;Chr3.g17595;Chr3.g17619;Ch…
BP	GO:0006412	translation	123	0.00042416	10.1889	118	5	#E61800	#FD0707	Chr1.g57407;Chr17.g24825;Chr13.g23676;Chr14.g48156;Chr8.g54753;Chr14.g47980;Chr3.g19921;Chr8.g55711;Chr3.g20012;Chr4.g38806;Chr2.g42878;Chr5.g06331;Chr13.g22924;Chr9.g46806;Chr1.g57477;Chr7.g31944;Chr16.g29256;Chr6.g50949;Chr10.g15203;Chr13.g22497;Chr1.g56449;Chr9.g46955;Chr10.g14475;Chr10.g15380;Chr11.g10816;Chr3.g17611;Chr4.g38612;Chr13.g22380;Chr16.g30578;Chr2.g41190;Chr3.g17595;Chr3.g17619;Ch…
BP	GO:0009059	macromolecule biosynthetic process	193	0.00042416	10.1494	167	26	#E61800	#D89B9B	Chr2.g42636;Chr5.g07615;Chr1.g57407;Chr12.g36260;Chr17.g25594;Chr17.g24825;Chr8.g53837;Chr13.g23676;Chr1.g57387;Chr8.g54753;Chr14.g47980;Chr3.g19921;Chr6.g52525;Chr5.g09320;Chr8.g55711;Chr3.g20012;Chr4.g38806;Chr2.g42878;Chr5.g06331;Chr15.g01400;Chr13.g22924;Scaffold6.g21075;Chr2.g42809;Chr9.g46806;Chr15.g03949;Chr1.g57477;Chr14.g47809;Chr7.g34102;Chr7.g31944;Chr11.g13042;Chr16.g29256;Chr6.g50949…
BP	GO:0044267	cellular protein metabolic process	178	0.00042416	10.0437	156	22	#E41A00	#D0B8B8	Chr17.g27784;Chr6.g50949;Chr1.g57407;Chr17.g24825;Chr13.g23676;Chr9.g44287;Chr14.g48156;Chr8.g56009;Chr14.g47980;Chr15.g03273;Chr3.g19921;Chr14.g50095;Chr3.g20012;Chr4.g38806;Chr2.g42878;Chr11.g12614;Chr5.g06331;Chr13.g22924;Chr9.g46806;Chr1.g57477;Chr4.g38170;Chr15.g04016;Chr7.g31944;Chr16.g29256;Chr7.g34513;Chr12.g37856;Chr10.g15203;Chr4.g40850;Contig22.g58910;Chr13.g22497;Chr1.g56449;Chr9.g469…
BP	GO:0006518	peptide metabolic process	128	0.00042416	9.89949	120	8	#E21C00	#F71E1E	Chr1.g57407;Chr17.g24825;Chr13.g23676;Chr14.g48156;Chr8.g54753;Chr14.g47980;Chr3.g19921;Chr8.g55711;Chr3.g20012;Chr4.g38806;Chr5.g09478;Chr5.g06331;Chr13.g22924;Chr9.g46806;Chr1.g57477;Chr7.g31944;Chr16.g29256;Chr6.g50949;Chr7.g33548;Chr10.g15203;Chr13.g22497;Chr1.g56449;Chr9.g46955;Chr10.g14475;Chr10.g15380;Chr11.g10816;Chr3.g17611;Chr10.g14650;Chr13.g22380;Chr16.g30578;Chr2.g41190;Chr3.g17595;C…
BP	GO:0019538	protein metabolic process	200	0.00042416	9.61665	168	32	#DD2100	#D5A5A5	Chr2.g42346;Chr17.g27781;Chr17.g27784;Chr6.g50949;Chr7.g34606;Chr1.g57407;Chr13.g22176;Chr17.g24825;Chr13.g23676;Chr9.g44287;Chr14.g48156;Chr14.g50301;Chr8.g56009;Chr14.g47980;Chr15.g03273;Chr3.g19921;Chr14.g50095;Chr3.g20012;Scaffold30.g59197;Chr2.g42878;Chr11.g12614;Chr5.g06331;Chr13.g22924;Chr9.g46806;Chr1.g57477;Chr4.g38170;Chr15.g04016;Chr7.g31944;Chr16.g29256;Chr7.g34513;Chr10.g14930;Chr10.…
BP	GO:0043603	cellular amide metabolic process	136	0.00042416	9.60392	124	12	#DD2100	#F81919	Chr5.g06050;Chr1.g57407;Chr17.g24825;Chr13.g23676;Chr14.g48156;Chr8.g54753;Chr14.g47980;Chr3.g19921;Chr8.g55711;Chr3.g20012;Chr4.g38806;Chr5.g08802;Chr5.g06331;Chr13.g22924;Chr9.g46806;Chr1.g57477;Chr5.g06044;Chr7.g31944;Chr16.g29256;Chr6.g50949;Chr10.g15203;Chr13.g22497;Chr15.g00960;Chr1.g56449;Chr9.g46955;Chr10.g14475;Chr10.g15380;Chr11.g10816;Chr3.g17611;Chr10.g14650;Chr5.g08702;Chr16.g30578;C…
BP	GO:0044249	cellular biosynthetic process	318	0.00044893	9.42097	243	75	#DA2400	#D0BABA	Contig41.g59303;Chr15.g01400;Chr2.g42636;Chr3.g17976;Chr5.g07615;Chr1.g57407;Chr12.g36260;Chr17.g25594;Chr17.g27595;Chr4.g39864;Chr14.g49573;Chr8.g53837;Chr2.g41367;Chr13.g23676;Chr11.g10517;Chr8.g54753;Chr14.g47980;Chr11.g12680;Chr3.g19921;Chr4.g40339;Chr6.g52525;Chr13.g24415;Chr7.g31710;Chr8.g55711;Chr3.g20012;Chr4.g38806;Chr13.g22734;Chr11.g12316;Chr7.g32632;Chr6.g51446;Chr7.g32636;Chr3.g19602…
BP	GO:1901564	organonitrogen compound metabolic process	319	0.000495207	9.12625	241	78	#D62800	#D3ADAD	Chr2.g42346;Chr17.g27781;Chr9.g46955;Chr17.g27784;Chr6.g50949;Chr7.g34606;Chr5.g06050;Chr1.g57407;Chr13.g22176;Chr17.g27595;Chr4.g39864;Scaffold4.g17474;Chr13.g23676;Chr8.g55875;Chr14.g48156;Chr3.g17851;Chr8.g54753;Chr14.g47980;Chr15.g03273;Chr3.g19921;Chr13.g24415;Chr8.g55711;Chr3.g20012;Scaffold30.g59197;Chr11.g12316;Chr6.g52008;Contig3.g09640;Chr6.g51446;Chr11.g12614;Chr1.g57190;Chr3.g19602;Ch…
BP	GO:1901576	organic substance biosynthetic process	334	0.000495811	8.64538	246	88	#CE3000	#D1B4B4	Contig41.g59303;Chr15.g01400;Chr2.g42636;Chr3.g17976;Chr5.g07615;Chr1.g57407;Chr12.g36260;Chr17.g25594;Chr17.g27595;Chr4.g39864;Chr14.g49573;Chr8.g53837;Chr2.g41367;Chr13.g23676;Chr1.g57387;Chr8.g54753;Chr14.g47980;Chr11.g12680;Chr3.g19921;Chr9.g46669;Chr6.g52525;Chr13.g24415;Chr5.g09320;Chr8.g55711;Chr3.g20012;Chr4.g38806;Chr13.g22734;Chr11.g12316;Chr17.g27772;Chr7.g32632;Chr1.g57714;Chr6.g51446…
BP	GO:0009058	biosynthetic process	358	0.000495207	7.71634	252	106	#C03E00	#D79F9F	Chr9.g45237;Chr15.g03949;Chr1.g57407;Chr17.g24825;Chr8.g53837;Chr8.g54753;Chr11.g09741;Chr13.g24415;Chr7.g31710;Chr8.g55711;Chr6.g52008;Scaffold9.g34897;Chr16.g29638;Chr15.g04732;Chr13.g22924;Chr11.g10846;Scaffold7.g27975;Chr12.g35575;Chr7.g31944;Chr11.g13042;Chr6.g50949;Chr13.g21588;Chr16.g31423;Chr16.g29082;Chr1.g56449;Chr17.g27398;Chr10.g14650;Chr2.g41849;Chr9.g45677;Chr7.g32049;Chr2.g42080;Ch…
BP	GO:0018298	protein-chromophore linkage	17	0.000356315	4.12311	17	0	#867800	#DD8484	Chr17.g26035;Chr17.g26034;Chr17.g27784;Chr10.g14455;Contig22.g58910;Chr14.g50095;Chr10.g14454;Chr12.g36001;Chr9.g46287;Chr3.g18379;Chr11.g12614;Chr5.g06309;Chr5.g06308;Chr17.g25854;Chr9.g44287;Chr15.g00321;Chr8.g56009
BP	GO:0009765	photosynthesis, light harvesting	17	0.000381012	4.12311	17	0	#867800	#DD8484	Chr17.g26035;Chr17.g26034;Chr17.g27784;Chr10.g14455;Chr10.g14454;Chr15.g00321;Contig22.g58910;Chr12.g36001;Chr9.g46287;Chr3.g18379;Chr11.g12614;Chr5.g06309;Chr5.g06308;Chr17.g25854;Chr9.g44287;Chr14.g50095;Chr8.g56009
BP	GO:0006270	DNA replication initiation	18	0.000356315	3.77124	17	1	#7F7F00	#DC8A8A	Contig41.g59303;Chr1.g58564;Chr10.g16710;Chr5.g08937;Chr2.g42636;Chr2.g41213;Chr3.g20265;Chr15.g02263;Chr11.g10397;Chr13.g23306;Chr16.g30216;Chr5.g08789;Contig3.g09644;Chr4.g39583;Chr15.g03492;Chr5.g06739;Chr11.g10405;Chr5.g06324
BP	GO:0006779	porphyrin-containing compound biosynthetic process	12	0.0474598	3.4641	12	0	#7A8400	#EC4949	Chr17.g27825;Chr12.g37311;Chr14.g49573;Chr14.g48867;Chr17.g26020;Chr8.g55875;Chr6.g51206;Chr3.g18331;Chr15.g00535;Chr14.g48492;Chr11.g12680;Chr12.g37310
BP	GO:0000028	ribosomal small subunit assembly	8	0.00537262	2.82843	8	0	#718D00	#D79F9F	Chr6.g51140;Chr9.g46806;Chr13.g22497;Chr10.g15483;Chr14.g50167;Chr10.g14475;Chr5.g07533;Chr17.g25157
BP	GO:0042440	pigment metabolic process	20	0.0210427	2.68328	16	4	#6E9000	#F62020	Chr5.g06005;Chr13.g23892;Chr14.g48492;Chr14.g49573;Chr11.g11474;Chr10.g14144;Chr10.g14121;Chr10.g14146;Chr17.g27772;Chr6.g52687;Chr6.g51206;Chr5.g05994;Scaffold9.g34897;Chr3.g18331;Chr12.g37311;Chr12.g37310;Chr11.g12680;Chr15.g03201;Chr15.g02994;Chr10.g14148
BP	GO:0022613	ribonucleoprotein complex biogenesis	14	0.0187915	2.67261	12	2	#6E9000	#DF7F7F	Chr3.g19326;Chr10.g15203;Chr2.g41394;Chr16.g28444;Chr5.g07132;Chr9.g47384;Chr7.g31944;Chr6.g51007;Chr1.g57190;Chr1.g57218;Chr15.g03298;Chr7.g32724;Chr16.g30489;Chr17.g24660
BP	GO:0009768	photosynthesis, light harvesting in photosystem I	7	7.90473e-05	2.64575	7	0	#6E9000	#D79D9D	Chr10.g14455;Contig22.g58910;Chr3.g18379;Chr11.g12614;Chr5.g06309;Chr5.g06308;Chr8.g56009
BP	GO:0046148	pigment biosynthetic process	19	0.0102117	2.52357	15	4	#6C9200	#DD8484	Chr5.g06005;Chr13.g23892;Chr14.g48492;Chr10.g14148;Chr11.g11474;Chr10.g14144;Chr10.g14121;Chr10.g14146;Chr17.g27772;Chr6.g52687;Chr6.g51206;Chr14.g49573;Scaffold9.g34897;Chr3.g18331;Chr12.g37311;Chr12.g37310;Chr11.g12680;Chr15.g02994;Chr5.g05994
BP	GO:0071669	plant-type cell wall organization or biogenesis	20	0.00495114	2.23607	15	5	#679700	#DA9090	Chr4.g39804;Chr11.g10110;Scaffold29.g59184;Chr7.g32061;Chr14.g50096;Chr16.g30628;Chr16.g30809;Chr13.g23905;Chr1.g57308;Chr3.g20462;Chr14.g49625;Chr1.g57037;Chr12.g36256;Chr1.g56874;Chr17.g25062;Chr16.g30606;Chr4.g38362;Chr7.g32520;Chr11.g10649;Chr11.g10698
BP	GO:0002181	cytoplasmic translation	8	0.0218188	2.12132	7	1	#659900	#F62020	Chr9.g47343;Chr1.g57190;Chr12.g36289;Chr7.g34774;Chr7.g31944;Chr1.g57218;Chr7.g32724;Chr4.g39763
BP	GO:0009664	plant-type cell wall organization	19	0.000356315	2.06474	14	5	#659900	#D4A9A9	Chr4.g39804;Chr11.g10110;Scaffold29.g59184;Chr7.g32061;Chr14.g50096;Chr16.g30628;Chr16.g30809;Chr13.g23905;Chr1.g57308;Chr3.g20462;Chr1.g56874;Chr1.g57037;Chr12.g36256;Chr17.g25062;Chr16.g30606;Chr4.g38362;Chr7.g32520;Chr11.g10649;Chr11.g10698
BP	GO:0006091	generation of precursor metabolites and energy	37	0.0102277	1.80839	24	13	#609E00	#DE8080	Chr17.g26035;Chr17.g26034;Scaffold9.g34913;Chr10.g14455;Chr10.g14454;Chr4.g39250;Chr17.g25826;Chr15.g00321;Scaffold17.g58712;Chr8.g53837;Chr17.g27784;Chr9.g44287;Chr8.g56009;Chr8.g53896;Chr14.g50098;Chr14.g50095;Chr6.g51193;Chr11.g12614;Chr17.g25854;Chr14.g48962;Chr2.g42405;Chr2.g42421;Scaffold13.g47518;Contig42.g59318;Chr17.g25835;Chr5.g06308;Chr9.g46287;Chr5.g08695;Chr12.g36001;Contig89.g59550;…
BP	GO:0006273	lagging strand elongation	3	0.0172547	1.73205	3	0	#609E00	#E66262	Chr2.g42636;Contig41.g59303;Chr15.g02263
BP	GO:0048316	seed development	5	0.0172547	1.34164	4	1	#59A500	#E95454	Chr1.g57370;Chr4.g40717;Chr12.g35111;Chr7.g33909;Chr12.g35139
BP	GO:0007623	circadian rhythm	7	0.00075293	1.13389	5	2	#56A800	#D79D9D	Chr7.g34610;Chr2.g43888;Scaffold2.g05240;Chr7.g34534;Chr2.g43780;Chr8.g56027;Chr1.g58326
BP	GO:0048511	rhythmic process	7	0.00075293	1.13389	5	2	#56A800	#D79D9D	Chr7.g34610;Chr2.g43888;Scaffold2.g05240;Chr7.g34534;Chr2.g43780;Chr8.g56027;Chr1.g58326
BP	GO:0000272	polysaccharide catabolic process	34	0.00537262	1.02899	20	14	#54AA00	#DC8A8A	Chr11.g12138;Chr4.g40692;Chr7.g31722;Chr12.g36686;Chr4.g38347;Chr12.g36060;Chr2.g42228;Chr16.g29181;Chr6.g52083;Chr14.g49312;Chr15.g02849;Chr5.g07905;Chr4.g38683;Chr16.g31274;Chr6.g52980;Chr16.g31276;Chr16.g31273;Chr6.g51532;Chr2.g43703;Chr7.g34150;Chr17.g25627;Chr5.g08001;Chr7.g34411;Chr2.g41893;Chr13.g22288;Chr10.g17323;Chr17.g25524;Chr17.g25523;Chr10.g15327;Chr15.g04817;Chr1.g56500;Chr12.g3662…
BP	GO:0009904	chloroplast accumulation movement	4	0.0066159	1	3	1	#54AA00	#DF7F7F	Chr11.g09852;Scaffold2.g05249;Chr15.g01844;Chr11.g09942
BP	GO:0006629	lipid metabolic process	100	0.0382637	0.4	52	48	#4AB400	#F71C1C	Chr7.g34357;Chr14.g48743;Chr6.g52898;Chr3.g20313;Chr7.g32334;Chr2.g44149;Chr11.g09741;Chr3.g19518;Chr9.g46669;Chr7.g32146;Chr7.g32632;Chr7.g32636;Chr11.g10846;Scaffold7.g27975;Chr12.g35575;Chr4.g40057;Chr12.g35261;Chr9.g47330;Chr8.g54496;Chr7.g31815;Chr14.g49980;Chr1.g56819;Chr13.g21588;Chr13.g22999;Chr16.g29082;Chr15.g04157;Chr8.g55539;Chr10.g13991;Chr16.g29579;Chr8.g53629;Chr9.g44540;Chr13.g232…
BP	GO:0045490	pectin catabolic process	19	0.0373107	-0.229416	9	10	#40BE00	#C0CEC0	Chr10.g15327;Chr2.g43703;Chr12.g36624;Chr13.g22288;Chr7.g34411;Chr4.g39315;Chr11.g12138;Chr7.g34150;Chr16.g31274;Chr15.g02849;Chr4.g40692;Chr7.g31722;Chr2.g41893;Chr12.g36686;Chr16.g31273;Chr4.g38347;Chr1.g56500;Chr2.g41636;Chr6.g51532
BP	GO:0005975	carbohydrate metabolic process	155	0.00257573	-0.562254	74	81	#39C500	#B1D2B1	Chr13.g23076;Chr1.g56375;Chr17.g25594;Chr9.g46019;Chr9.g46018;Chr12.g36060;Chr2.g42228;Chr7.g32534;Chr7.g32536;Chr14.g49312;Chr7.g32533;Chr7.g32532;Chr5.g07905;Chr9.g45588;Chr6.g53430;Chr13.g23684;Chr5.g07124;Chr13.g23688;Scaffold6.g21075;Scaffold13.g47518;Chr8.g53594;Chr11.g13042;Chr1.g56890;Chr11.g10793;Chr4.g40369;Chr17.g25524;Scaffold2.g05435;Chr17.g25523;Chr15.g04817;Chr9.g46488;Chr1.g58326;…
BP	GO:0044085	cellular component biogenesis	30	0.000536264	-0.730297	13	17	#37C700	#A9D4A9	Chr3.g19326;Chr16.g28599;Chr14.g49625;Chr9.g46019;Chr9.g46018;Chr15.g03298;Contig43.g59325;Chr13.g21339;Chr9.g47384;Chr2.g42856;Chr16.g30606;Chr16.g30489;Chr17.g24660;Chr16.g30628;Chr6.g51007;Chr16.g28444;Chr7.g31944;Chr9.g46023;Chr5.g05820;Chr16.g28598;Chr10.g15203;Chr9.g46488;Chr1.g57190;Chr13.g23297;Chr10.g13919;Chr2.g41394;Chr4.g38267;Chr1.g57218;Chr7.g32724;Chr5.g07132
BP	GO:0042737	drug catabolic process	43	0.0189648	-0.762493	19	24	#37C700	#A7D5A7	Chr4.g38541;Chr10.g17092;Chr2.g42731;Chr5.g06050;Chr11.g12138;Chr2.g42088;Chr4.g40692;Chr7.g31722;Chr12.g36686;Chr2.g42135;Chr15.g02580;Chr4.g38347;Chr8.g56103;Chr10.g13866;Chr3.g19785;Chr16.g31274;Contig34.g59246;Chr7.g34150;Chr4.g38536;Chr15.g02849;Chr3.g20181;Chr16.g31273;Chr11.g12671;Chr4.g38539;Chr2.g43703;Chr10.g15327;Chr5.g06044;Chr10.g17262;Chr7.g34411;Chr8.g54133;Chr2.g41893;Chr13.g22288…
BP	GO:0005976	polysaccharide metabolic process	70	0.00042416	-0.956183	31	39	#34CA00	#9DD79D	Chr10.g14453;Chr9.g46019;Chr17.g25826;Chr9.g46018;Chr11.g12138;Chr16.g28599;Chr17.g25594;Chr4.g40692;Chr7.g31722;Chr12.g36686;Chr8.g53837;Chr4.g38347;Contig43.g59325;Chr12.g36060;Chr7.g34150;Chr16.g29181;Chr6.g52083;Chr14.g49312;Chr15.g02849;Chr13.g21339;Chr5.g07905;Chr10.g17114;Chr2.g42228;Chr16.g31274;Chr6.g52980;Chr16.g31276;Chr7.g34736;Chr1.g56500;Chr16.g31273;Chr16.g30606;Chr2.g42856;Chr14.g…
BP	GO:0071554	cell wall organization or biogenesis	67	0.00042416	-1.09952	29	38	#32CC00	#96D996	Scaffold29.g59184;Chr13.g23905;Chr9.g46019;Chr11.g12374;Chr11.g12138;Chr16.g28599;Chr14.g49625;Chr1.g57037;Chr4.g40692;Chr7.g31722;Chr11.g10936;Chr12.g36686;Chr17.g25062;Chr4.g38362;Chr4.g38347;Contig43.g59325;Chr7.g34150;Chr11.g10110;Chr7.g34736;Chr16.g28598;Chr7.g32061;Chr10.g17114;Chr16.g30809;Chr13.g21339;Chr11.g12752;Chr3.g20462;Chr16.g31274;Chr15.g02849;Chr2.g42856;Chr1.g56500;Chr16.g31273;…
BP	GO:0071555	cell wall organization	66	0.00042416	-1.23091	28	38	#30CE00	#90DA90	Scaffold29.g59184;Chr13.g23905;Chr9.g46019;Chr11.g12374;Chr11.g12138;Chr16.g28599;Chr17.g25594;Chr1.g57037;Chr4.g40692;Chr7.g31722;Chr11.g10936;Chr12.g36686;Chr17.g25062;Chr4.g38362;Chr4.g38347;Contig43.g59325;Chr7.g34150;Chr11.g10110;Chr7.g34736;Chr7.g32061;Chr10.g17114;Chr16.g30809;Chr13.g21339;Chr11.g12752;Chr3.g20462;Chr16.g31274;Chr15.g02849;Chr2.g42856;Chr1.g56500;Chr16.g31273;Chr16.g30606;…
BP	GO:0045229	external encapsulating structure organization	66	0.00042416	-1.23091	28	38	#30CE00	#90DA90	Scaffold29.g59184;Chr13.g23905;Chr9.g46019;Chr11.g12374;Chr11.g12138;Chr16.g28599;Chr17.g25594;Chr1.g57037;Chr4.g40692;Chr7.g31722;Chr11.g10936;Chr12.g36686;Chr17.g25062;Chr4.g38362;Chr4.g38347;Contig43.g59325;Chr7.g34150;Chr11.g10110;Chr7.g34736;Chr7.g32061;Chr10.g17114;Chr16.g30809;Chr13.g21339;Chr11.g12752;Chr3.g20462;Chr16.g31274;Chr15.g02849;Chr2.g42856;Chr1.g56500;Chr16.g31273;Chr16.g30606;…
BP	GO:0044264	cellular polysaccharide metabolic process	45	0.000814365	-1.63978	17	28	#28D600	#7DDF7D	Chr10.g14453;Contig43.g59325;Chr17.g25826;Chr9.g46018;Chr16.g28599;Chr17.g25594;Chr13.g22469;Chr9.g46019;Chr8.g53837;Chr7.g34736;Chr12.g36060;Chr2.g42228;Chr6.g52083;Chr14.g49312;Chr10.g17114;Chr13.g21339;Scaffold2.g05240;Chr16.g31276;Chr2.g42856;Chr16.g30606;Chr14.g48962;Scaffold6.g21075;Chr13.g23447;Chr17.g25627;Chr16.g30628;Chr17.g25835;Chr5.g08001;Chr15.g01394;Chr5.g08695;Chr11.g13042;Chr9.g4…
BP	GO:0044262	cellular carbohydrate metabolic process	59	0.00042416	-1.69246	23	36	#28D600	#7BE07B	Chr10.g14453;Contig43.g59325;Chr17.g25826;Chr1.g56375;Chr9.g46018;Chr16.g28599;Chr17.g25594;Chr3.g17976;Chr13.g22469;Chr9.g46019;Chr8.g53837;Chr7.g34736;Chr12.g36060;Chr2.g42228;Chr14.g49352;Chr6.g52083;Chr14.g49312;Chr10.g17114;Chr5.g09320;Chr13.g21339;Scaffold2.g05240;Chr17.g26615;Chr16.g31276;Chr2.g42856;Chr3.g20733;Chr16.g30606;Chr1.g58326;Scaffold6.g21075;Chr13.g23447;Chr17.g25627;Chr16.g306…
BP	GO:0006073	cellular glucan metabolic process	43	0.00042416	-1.98248	15	28	#24DA00	#6DE36D	Chr10.g14453;Contig43.g59325;Chr17.g25826;Chr8.g53837;Chr16.g28599;Chr17.g25594;Chr13.g22469;Chr9.g46019;Chr9.g46018;Chr7.g34736;Chr12.g36060;Chr2.g42228;Chr6.g52083;Chr14.g49312;Chr10.g17114;Chr13.g21339;Scaffold2.g05240;Chr16.g31276;Chr2.g42856;Chr16.g30606;Chr14.g48962;Scaffold6.g21075;Chr17.g25627;Chr16.g30628;Chr17.g25835;Chr15.g01394;Chr5.g08695;Chr11.g13042;Chr9.g46023;Chr10.g17323;Chr16.g…
BP	GO:0044042	glucan metabolic process	43	0.00042416	-1.98248	15	28	#24DA00	#6DE36D	Chr10.g14453;Contig43.g59325;Chr17.g25826;Chr8.g53837;Chr16.g28599;Chr17.g25594;Chr13.g22469;Chr9.g46019;Chr9.g46018;Chr7.g34736;Chr12.g36060;Chr2.g42228;Chr6.g52083;Chr14.g49312;Chr10.g17114;Chr13.g21339;Scaffold2.g05240;Chr16.g31276;Chr2.g42856;Chr16.g30606;Chr14.g48962;Scaffold6.g21075;Chr17.g25627;Chr16.g30628;Chr17.g25835;Chr15.g01394;Chr5.g08695;Chr11.g13042;Chr9.g46023;Chr10.g17323;Chr16.g…
BP	GO:0019419	sulfate reduction	4	0.0066159	-2	0	4	#24DA00	#6BE46B	Chr10.g13849;Chr5.g05767;Chr3.g18598;Chr9.g46421
BP	GO:0044036	cell wall macromolecule metabolic process	24	0.00042416	-2.04124	7	17	#24DA00	#69E469	Chr4.g38541;Chr16.g28599;Chr16.g28598;Chr2.g42088;Chr9.g46019;Chr9.g46018;Contig43.g59325;Contig34.g59246;Chr13.g21339;Chr4.g38536;Chr2.g42856;Chr16.g30606;Chr4.g38539;Chr13.g23447;Chr16.g30628;Chr5.g08001;Chr9.g46023;Chr5.g05820;Chr2.g42090;Chr9.g46488;Chr13.g23297;Chr10.g13919;Chr4.g38267;Chr10.g14475
BP	GO:0010410	hemicellulose metabolic process	17	0.0161268	-3.15296	2	15	#10EE00	#35F135	Chr13.g23447;Chr5.g05820;Chr4.g38267;Chr16.g30628;Chr13.g21339;Chr5.g08001;Chr13.g23297;Chr10.g13919;Chr16.g28598;Chr9.g46488;Chr2.g42856;Chr16.g28599;Chr9.g46019;Chr9.g46018;Chr16.g30606;Contig43.g59325;Chr9.g46023
BP	GO:0010383	cell wall polysaccharide metabolic process	17	0.0277281	-3.15296	2	15	#10EE00	#35F135	Chr13.g23447;Chr5.g05820;Chr4.g38267;Chr16.g30628;Chr13.g21339;Chr5.g08001;Chr13.g23297;Chr10.g13919;Chr16.g28598;Chr9.g46488;Chr2.g42856;Chr16.g28599;Chr9.g46019;Chr9.g46018;Chr16.g30606;Contig43.g59325;Chr9.g46023
BP	GO:0010411	xyloglucan metabolic process	15	0.00042416	-3.87298	0	15	#04FA00	#13FA13	Chr4.g38267;Chr16.g30628;Chr13.g21339;Chr5.g05820;Chr13.g23297;Chr10.g13919;Chr16.g28598;Chr9.g46488;Chr2.g42856;Chr16.g28599;Chr9.g46019;Chr9.g46018;Chr16.g30606;Contig43.g59325;Chr9.g46023
CC	GO:1990904	ribonucleoprotein complex	165	0.00042416	11.5996	157	8	#FF0000	#CCCCCC	Chr9.g44892;Chr14.g47873;Chr1.g57407;Chr17.g24825;Chr13.g23676;Chr14.g48156;Chr8.g54753;Chr14.g47980;Chr3.g19921;Scaffold1.g05152;Chr5.g09103;Contig1.g04961;Chr8.g55711;Chr3.g20012;Chr4.g38806;Chr9.g47384;Chr17.g27677;Chr5.g06331;Chr13.g22924;Chr17.g24660;Chr9.g46806;Chr1.g57477;Chr14.g47809;Chr9.g44538;Chr7.g31944;Chr7.g31613;Chr17.g25172;Chr16.g29256;Chr6.g50949;Chr8.g55788;Chr10.g15203;Chr10.g…
CC	GO:0032991	protein-containing complex	294	0.000495207	10.0312	233	61	#E41A00	#D89B9B	Chr2.g42346;Chr9.g44892;Chr11.g12597;Chr10.g15603;Chr9.g44681;Chr5.g07615;Chr1.g57407;Chr17.g27595;Chr17.g24826;Chr4.g40616;Chr17.g27784;Chr13.g23676;Chr9.g44287;Chr11.g10784;Chr14.g48156;Chr8.g54753;Chr4.g38612;Chr14.g47980;Chr7.g31576;Chr3.g19921;Chr14.g47873;Chr5.g09103;Contig1.g04961;Chr14.g50095;Chr3.g20012;Chr4.g38806;Chr17.g26405;Chr9.g47384;Chr17.g25854;Chr11.g12348;Chr17.g27677;Chr11.g12…
CC	GO:0043228	non-membrane-bounded organelle	140	0.00042416	9.80379	128	12	#E21C00	#D79D9D	Chr14.g47873;Chr1.g57407;Chr17.g27595;Chr13.g23676;Chr14.g48156;Chr8.g54753;Chr4.g38612;Chr14.g47980;Chr5.g09103;Chr8.g55711;Chr3.g20012;Chr4.g38806;Chr9.g47384;Chr5.g06331;Chr13.g22924;Chr17.g24660;Chr9.g46806;Chr14.g47809;Chr7.g31944;Chr7.g31613;Chr17.g25172;Chr16.g29256;Chr6.g50949;Chr10.g15203;Chr10.g16899;Chr2.g41394;Chr16.g29082;Chr3.g18442;Chr1.g56449;Chr9.g46955;Chr10.g14475;Chr7.g34377;C…
CC	GO:0043232	intracellular non-membrane-bounded organelle	140	0.00042416	9.80379	128	12	#E21C00	#DD8484	Chr14.g47873;Chr1.g57407;Chr17.g27595;Chr13.g23676;Chr14.g48156;Chr8.g54753;Chr4.g38612;Chr14.g47980;Chr5.g09103;Chr8.g55711;Chr3.g20012;Chr4.g38806;Chr9.g47384;Chr5.g06331;Chr13.g22924;Chr17.g24660;Chr9.g46806;Chr14.g47809;Chr7.g31944;Chr7.g31613;Chr17.g25172;Chr16.g29256;Chr6.g50949;Chr10.g15203;Chr10.g16899;Chr2.g41394;Chr16.g29082;Chr3.g18442;Chr1.g56449;Chr9.g46955;Chr10.g14475;Chr7.g34377;C…
CC	GO:0043226	organelle	530	0.000536264	9.72994	377	153	#DF1F00	#D6A1A1	Chr13.g24317;Chr14.g47873;Chr15.g03949;Chr1.g57407;Chr6.g51057;Chr8.g53837;Chr6.g51117;Chr8.g54753;Chr11.g09741;Chr8.g55711;Chr14.g50091;Chr13.g24557;Chr10.g15296;Chr13.g22924;Chr9.g44887;Chr14.g47588;Chr10.g17262;Chr7.g31944;Chr6.g50949;Chr15.g00169;Chr15.g04493;Chr16.g29082;Chr1.g56449;Chr14.g50238;Chr4.g38612;Chr14.g49765;Chr7.g32035;Chr7.g32049;Chr13.g23306;Chr13.g22786;Chr12.g36686;Chr5.g076…
CC	GO:0043229	intracellular organelle	529	0.000536264	9.69565	376	153	#DF1F00	#D6A1A1	Chr13.g24317;Chr14.g47873;Chr15.g03949;Chr1.g57407;Chr6.g51057;Chr8.g53837;Chr6.g51117;Chr8.g54753;Chr11.g09741;Chr8.g55711;Chr14.g50091;Chr13.g24557;Chr10.g15296;Chr13.g22924;Chr9.g44887;Chr14.g47588;Chr10.g17262;Chr7.g31944;Chr6.g50949;Chr15.g00169;Chr15.g04493;Chr16.g29082;Chr1.g56449;Chr14.g50238;Chr4.g38612;Chr14.g49765;Chr7.g32035;Chr7.g32049;Chr13.g23306;Chr13.g22786;Chr12.g36686;Chr5.g076…
CC	GO:0005840	ribosome	109	0.00042416	9.67405	105	4	#DF1F00	#D79D9D	Chr1.g57407;Chr17.g27595;Chr13.g23676;Chr14.g48156;Chr8.g54753;Chr14.g47980;Chr8.g55711;Chr3.g20012;Chr4.g38806;Chr9.g47384;Chr5.g06331;Chr13.g22924;Chr17.g24660;Chr9.g46806;Chr14.g47809;Chr7.g31944;Chr7.g31613;Chr16.g29256;Chr6.g50949;Chr10.g15203;Chr1.g56449;Chr9.g46955;Chr10.g14475;Chr11.g10816;Chr3.g17611;Chr4.g38612;Chr13.g22380;Chr16.g30578;Chr2.g41190;Chr3.g17619;Chr7.g34774;Chr5.g06281;Ch…
CC	GO:0005634	nucleus	317	0.000531666	7.47002	225	92	#BB4300	#D4A9A9	Chr16.g30452;Chr15.g03074;Chr8.g53935;Chr13.g24317;Chr7.g34606;Chr2.g42636;Chr15.g00784;Chr7.g34647;Chr15.g03949;Chr12.g37715;Chr5.g05938;Chr12.g36260;Chr17.g27145;Chr6.g51057;Chr5.g08113;Chr3.g18343;Scaffold1.g05220;Chr2.g44226;Chr11.g10784;Chr5.g07782;Chr8.g54460;Chr10.g16850;Chr17.g26361;Chr14.g47980;Chr6.g51107;Chr15.g01485;Chr6.g52086;Chr7.g32840;Chr11.g13284;Chr4.g40472;Chr16.g31416;Chr14.g…
CC	GO:0044391	ribosomal subunit	55	0.000381012	6.87684	53	2	#B24C00	#D89999	Chr10.g15380;Chr11.g10919;Chr11.g10816;Chr10.g14650;Chr13.g23618;Chr16.g30578;Chr3.g17595;Chr10.g15483;Chr16.g29567;Chr17.g26133;Chr17.g24825;Chr4.g38144;Chr5.g07533;Chr2.g42754;Chr13.g23676;Chr8.g54205;Chr6.g52466;Chr15.g00153;Chr9.g47343;Chr3.g19921;Chr11.g10801;Contig1.g04961;Chr4.g38806;Contig2.g05602;Chr3.g20031;Chr5.g06331;Chr16.g30373;Chr13.g22497;Chr4.g39763;Scaffold18.g58754;Chr7.g32724;…
CC	GO:0044445	cytosolic part	41	0.000381012	6.09078	40	1	#A55900	#D3ADAD	Chr11.g10919;Chr11.g10816;Chr16.g30578;Chr3.g17595;Chr10.g15483;Chr7.g34774;Chr17.g26133;Chr5.g07533;Chr13.g23676;Chr6.g52466;Chr15.g00153;Chr9.g47343;Chr3.g19921;Contig1.g04961;Chr4.g38806;Contig2.g05602;Chr1.g57190;Chr3.g20031;Chr5.g06331;Chr13.g22497;Scaffold18.g58754;Chr9.g46806;Chr11.g10801;Chr14.g50167;Chr12.g36289;Chr7.g31944;Chr16.g29256;Chr13.g22358;Chr17.g25157;Chr17.g25353;Chr6.g51140;…
CC	GO:0015934	large ribosomal subunit	32	0.000356315	5.3033	31	1	#996500	#D89999	Chr10.g15380;Chr11.g10816;Chr10.g14650;Chr13.g23618;Chr3.g17595;Chr7.g34774;Chr17.g26133;Chr17.g24825;Chr4.g38144;Chr2.g42754;Chr6.g52466;Chr15.g00153;Chr9.g47343;Contig1.g04961;Chr4.g38806;Chr5.g06331;Chr16.g30373;Chr5.g08897;Chr12.g36289;Chr7.g31944;Chr3.g19481;Chr16.g29256;Chr13.g22358;Chr10.g15203;Chr7.g32724;Chr12.g36497;Chr11.g13327;Chr9.g45295;Chr1.g57218;Chr10.g14472;Chr1.g57190;Chr4.g397…
CC	GO:0022625	cytosolic large ribosomal subunit	23	0.000356315	4.3788	22	1	#897500	#D99494	Chr11.g10816;Chr3.g17595;Chr12.g36289;Chr17.g26133;Chr6.g52466;Chr15.g00153;Chr9.g47343;Contig1.g04961;Chr4.g38806;Chr5.g06331;Chr7.g34774;Chr7.g31944;Chr16.g29256;Chr13.g22358;Chr10.g15203;Chr7.g32724;Chr12.g36497;Chr11.g13327;Chr9.g45295;Chr1.g57218;Chr10.g14472;Chr1.g57190;Chr4.g39763
CC	GO:0015935	small ribosomal subunit	23	0.000419611	4.3788	22	1	#897500	#D89898	Chr11.g10919;Chr16.g30578;Chr10.g15483;Chr16.g29567;Chr5.g07533;Chr13.g23676;Chr8.g54205;Chr3.g19921;Chr11.g12029;Contig2.g05602;Chr3.g20031;Chr13.g22497;Scaffold18.g58754;Chr9.g46806;Chr9.g46964;Chr11.g10801;Chr1.g57477;Chr14.g50167;Scaffold17.g58700;Chr17.g25157;Chr6.g51140;Chr7.g32689;Chr10.g14475
CC	GO:0009522	photosystem I	19	0.000356315	4.3589	19	0	#897500	#D4A9A9	Chr17.g26035;Chr17.g26034;Chr5.g06421;Chr17.g27784;Chr10.g14455;Contig22.g58910;Chr14.g50095;Chr10.g14454;Chr12.g36001;Chr9.g46287;Chr3.g18379;Contig89.g59550;Chr11.g12614;Chr5.g06309;Chr5.g06308;Chr17.g25854;Chr9.g44287;Chr15.g00321;Chr8.g56009
CC	GO:0022627	cytosolic small ribosomal subunit	17	0.000356315	4.12311	17	0	#867800	#D89B9B	Chr11.g10919;Scaffold18.g58754;Chr16.g29567;Chr3.g19921;Chr11.g10801;Chr16.g30578;Chr14.g50167;Chr10.g15483;Chr9.g46806;Chr10.g14475;Contig2.g05602;Chr6.g51140;Chr3.g20031;Chr17.g25157;Chr5.g07533;Chr13.g23676;Chr13.g22497
CC	GO:0009521	photosystem	20	0.000356315	4.02492	19	1	#847A00	#DA9090	Chr17.g26035;Chr17.g26034;Chr5.g06421;Chr17.g27784;Chr10.g14455;Contig22.g58910;Chr14.g50095;Chr10.g14454;Chr12.g36001;Chr9.g46287;Chr3.g18379;Contig89.g59550;Chr11.g12614;Chr15.g04487;Chr5.g06309;Chr5.g06308;Chr17.g25854;Chr9.g44287;Chr15.g00321;Chr8.g56009
CC	GO:0009523	photosystem II	18	0.000356315	3.77124	17	1	#7F7F00	#F62222	Chr17.g26035;Chr17.g26034;Chr17.g27784;Chr10.g14455;Contig22.g58910;Chr14.g50095;Chr10.g14454;Chr12.g36001;Chr9.g46287;Chr3.g18379;Chr11.g12614;Chr15.g04487;Chr5.g06309;Chr5.g06308;Chr17.g25854;Chr9.g44287;Chr15.g00321;Chr8.g56009
CC	GO:0044452	nucleolar part	12	0.00373788	3.4641	12	0	#7A8400	#D4A9A9	Chr12.g35234;Chr5.g09103;Chr10.g16899;Chr12.g35415;Chr5.g07615;Chr17.g27704;Chr4.g40616;Chr17.g27736;Chr17.g27677;Chr17.g27743;Chr15.g03298;Chr5.g07132
CC	GO:0005732	small nucleolar ribonucleoprotein complex	11	0.00042416	3.31662	11	0	#788600	#FA1111	Chr12.g35234;Chr17.g27736;Chr10.g16899;Chr12.g35415;Chr5.g09103;Chr17.g27704;Chr4.g40616;Chr17.g27677;Chr17.g27743;Chr15.g03298;Chr5.g07132
CC	GO:0030684	preribosome	14	0.00142889	3.20713	13	1	#788600	#D4ABAB	Chr6.g51007;Chr14.g47920;Chr12.g35234;Chr10.g16969;Chr12.g35415;Chr9.g44538;Chr4.g40616;Chr2.g42156;Chr17.g25172;Chr7.g33378;Chr16.g29081;Chr3.g20600;Chr15.g03298;Chr9.g46788
CC	GO:0032040	small-subunit processome	9	0.0128178	3	9	0	#738B00	#DD8484	Chr3.g20600;Chr12.g35234;Chr12.g35415;Chr9.g44538;Chr4.g40616;Chr2.g42156;Chr16.g29081;Chr7.g33378;Chr15.g03298
CC	GO:0042651	thylakoid membrane	24	0.00802864	2.85774	19	5	#718D00	#D79D9D	Chr17.g26035;Chr17.g26034;Chr17.g27784;Chr10.g14455;Chr10.g14454;Chr15.g00321;Chr12.g36001;Chr5.g07652;Scaffold9.g34913;Chr9.g44287;Chr8.g56009;Chr4.g40777;Chr14.g50098;Chr14.g50095;Chr6.g51193;Chr11.g12614;Chr17.g25854;Chr15.g01501;Chr9.g46287;Chr4.g40031;Contig22.g58910;Chr3.g18379;Chr5.g06309;Chr5.g06308
CC	GO:0034357	photosynthetic membrane	24	0.00802864	2.85774	19	5	#718D00	#DC8A8A	Chr17.g26035;Chr17.g26034;Chr17.g27784;Chr10.g14455;Chr10.g14454;Chr15.g00321;Chr12.g36001;Chr5.g07652;Scaffold9.g34913;Chr9.g44287;Chr8.g56009;Chr4.g40777;Chr14.g50098;Chr14.g50095;Chr6.g51193;Chr11.g12614;Chr17.g25854;Chr15.g01501;Chr9.g46287;Chr4.g40031;Contig22.g58910;Chr3.g18379;Chr5.g06309;Chr5.g06308
CC	GO:0010287	plastoglobule	8	0.0037406	2.82843	8	0	#718D00	#DA9292	Chr10.g14455;Contig22.g58910;Chr3.g18379;Chr11.g12614;Chr5.g06309;Chr5.g06308;Chr15.g03446;Chr8.g56009
CC	GO:0009535	chloroplast thylakoid membrane	23	0.0218188	2.71069	18	5	#6E9000	#DD8484	Chr17.g26035;Chr17.g26034;Chr17.g27784;Chr10.g14455;Chr10.g14454;Chr15.g00321;Chr12.g36001;Chr5.g07652;Scaffold9.g34913;Chr9.g44287;Chr8.g56009;Chr4.g40777;Chr14.g50098;Chr14.g50095;Chr6.g51193;Chr11.g12614;Chr17.g25854;Chr15.g01501;Chr9.g46287;Contig22.g58910;Chr3.g18379;Chr5.g06309;Chr5.g06308
CC	GO:0055035	plastid thylakoid membrane	23	0.0218188	2.71069	18	5	#6E9000	#F81919	Chr17.g26035;Chr17.g26034;Chr17.g27784;Chr10.g14455;Chr10.g14454;Chr15.g00321;Chr12.g36001;Chr5.g07652;Scaffold9.g34913;Chr9.g44287;Chr8.g56009;Chr4.g40777;Chr14.g50098;Chr14.g50095;Chr6.g51193;Chr11.g12614;Chr17.g25854;Chr15.g01501;Chr9.g46287;Contig22.g58910;Chr3.g18379;Chr5.g06309;Chr5.g06308
CC	GO:0042555	MCM complex	10	0.000356315	2.52982	9	1	#6C9200	#F62222	Chr1.g58564;Chr2.g41213;Chr13.g23306;Chr16.g30216;Chr5.g08789;Chr5.g08937;Chr15.g03492;Chr5.g06739;Chr10.g16710;Chr5.g06324
CC	GO:0031428	box C/D snoRNP complex	4	0.0066159	2	4	0	#659900	#D1B4B4	Chr12.g35415;Chr15.g03298;Chr12.g35234;Chr4.g40616
CC	GO:0044436	thylakoid part	32	0.00937521	1.76777	21	11	#609E00	#D4A9A9	Chr17.g26035;Chr17.g26034;Chr17.g27784;Chr10.g14455;Chr10.g14454;Chr15.g00321;Chr12.g36001;Chr5.g07652;Chr1.g57384;Scaffold9.g34913;Chr9.g44287;Chr8.g56009;Chr4.g40777;Chr14.g50098;Chr3.g18453;Chr14.g50095;Chr8.g54955;Chr6.g51193;Chr15.g04487;Chr11.g12614;Chr17.g25854;Chr15.g01501;Chr9.g46287;Chr16.g28185;Chr4.g40031;Contig89.g59550;Contig22.g58910;Chr3.g18379;Chr5.g06309;Chr5.g06308;Chr5.g06421;…
CC	GO:0005618	cell wall	43	0.00042416	-1.06749	18	25	#32CC00	#98D898	Chr14.g49653;Scaffold29.g59184;Chr16.g28599;Chr14.g48663;Chr13.g23297;Chr1.g57037;Chr4.g40692;Chr14.g48358;Chr9.g46019;Chr9.g46018;Chr4.g39804;Contig43.g59325;Chr11.g10110;Chr16.g30809;Chr13.g21339;Chr3.g20462;Chr16.g31274;Chr15.g02849;Chr2.g42856;Chr3.g20181;Chr2.g41819;Chr16.g31273;Chr16.g30606;Chr11.g10649;Chr13.g23892;Chr13.g23278;Chr16.g30628;Chr1.g57308;Chr14.g49471;Chr9.g46023;Chr5.g05820;…
CC	GO:0030312	external encapsulating structure	43	0.00042416	-1.06749	18	25	#32CC00	#98D898	Chr14.g49653;Scaffold29.g59184;Chr16.g28599;Chr14.g48663;Chr13.g23297;Chr1.g57037;Chr4.g40692;Chr14.g48358;Chr9.g46019;Chr9.g46018;Chr4.g39804;Contig43.g59325;Chr11.g10110;Chr16.g30809;Chr13.g21339;Chr3.g20462;Chr16.g31274;Chr15.g02849;Chr2.g42856;Chr3.g20181;Chr2.g41819;Chr16.g31273;Chr16.g30606;Chr11.g10649;Chr13.g23892;Chr13.g23278;Chr16.g30628;Chr1.g57308;Chr14.g49471;Chr9.g46023;Chr5.g05820;…
MF	GO:0003735	structural constituent of ribosome	132	0.00042416	10.6187	127	5	#EE1000	#F52424	Chr1.g57407;Chr17.g24825;Chr13.g23676;Chr14.g48156;Chr8.g54753;Chr14.g47980;Chr3.g19921;Contig1.g04961;Chr8.g55711;Chr3.g20012;Chr4.g38806;Chr2.g42878;Chr5.g06331;Chr13.g22924;Chr9.g46806;Chr1.g57477;Chr14.g47809;Chr7.g31944;Chr16.g29256;Chr6.g50949;Chr10.g15203;Chr13.g22497;Chr1.g56449;Chr9.g46955;Chr10.g14475;Chr10.g15380;Chr11.g10816;Chr3.g17611;Chr10.g14650;Chr13.g22380;Chr16.g30578;Chr2.g411…
MF	GO:0005198	structural molecule activity	143	0.00042416	10.2858	133	10	#E91500	#F81919	Chr9.g44681;Chr1.g57407;Chr17.g24825;Chr4.g38362;Chr13.g23676;Chr14.g48156;Chr8.g54753;Chr10.g14650;Chr14.g47980;Chr3.g19921;Contig1.g04961;Chr8.g55711;Chr3.g20012;Chr4.g38806;Chr2.g42878;Chr5.g06331;Chr13.g22924;Chr9.g46806;Chr1.g57477;Chr14.g47809;Chr7.g31944;Chr16.g29256;Chr6.g50949;Chr10.g15203;Chr13.g22497;Chr1.g56449;Chr9.g46955;Chr10.g14475;Chr10.g15380;Chr11.g10816;Chr3.g17611;Chr4.g38612…
MF	GO:0016168	chlorophyll binding	17	0.000356315	4.12311	17	0	#867800	#F91717	Chr17.g26035;Chr17.g26034;Chr17.g27784;Chr10.g14455;Chr10.g14454;Chr15.g00321;Contig22.g58910;Chr12.g36001;Chr9.g46287;Chr3.g18379;Chr11.g12614;Chr5.g06309;Chr5.g06308;Chr17.g25854;Chr9.g44287;Chr14.g50095;Chr8.g56009
MF	GO:0019843	rRNA binding	15	0.0385132	3.35659	14	1	#7A8400	#D1B4B4	Chr3.g20600;Chr10.g14802;Chr9.g46964;Chr7.g31561;Chr1.g57190;Chr12.g36497;Chr9.g45295;Chr7.g31944;Chr9.g46439;Chr16.g29256;Chr5.g06734;Chr13.g22358;Chr10.g14475;Chr1.g56414;Chr8.g54753
MF	GO:0030515	snoRNA binding	8	0.00105509	2.82843	8	0	#718D00	#F52424	Chr6.g51007;Chr12.g35234;Chr5.g09103;Chr10.g16899;Chr12.g35415;Chr4.g40616;Chr3.g20600;Chr5.g07132
MF	GO:0004503	monophenol monooxygenase activity	6	0.00807423	2.44949	6	0	#6C9200	#F23333	Chr5.g06005;Chr10.g14148;Chr10.g14144;Chr10.g14121;Chr10.g14146;Chr5.g05994
MF	GO:0016716	oxidoreductase activity,another donor and incorporation oxygen	6	0.00807423	2.44949	6	0	#6C9200	#D0B8B8	Chr5.g06005;Chr10.g14148;Chr10.g14144;Chr10.g14121;Chr10.g14146;Chr5.g05994
MF	GO:0008883	glutamyl-tRNA reductase activity	4	0.0066159	2	4	0	#659900	#F32C2C	Chr17.g26020;Chr15.g00535;Chr14.g48867;Chr8.g55875
MF	GO:0003896	DNA primase activity	4	0.033837	2	4	0	#659900	#D79F9F	Chr2.g42636;Chr13.g23429;Contig41.g59303;Chr15.g02263
MF	GO:0004097	catechol oxidase activity	7	0.0296478	1.88982	6	1	#629C00	#D0BABA	Chr5.g06005;Chr10.g14148;Chr10.g14144;Chr10.g14121;Chr10.g14146;Chr5.g06009;Chr5.g05994
MF	GO:0031386	protein tag	5	0.0418058	1.34164	4	1	#59A500	#D3AFAF	Chr14.g47862;Chr14.g47980;Chr7.g31635;Chr1.g56449;Chr4.g38170
MF	GO:0046906	tetrapyrrole binding	91	0.000485369	1.15311	51	40	#56A800	#FD0707	Chr17.g27784;Chr2.g42731;Chr2.g42135;Chr9.g44287;Chr10.g13866;Chr8.g56009;Chr11.g10063;Chr11.g12614;Chr5.g06333;Chr2.g41837;Chr6.g51516;Chr14.g49770;Chr16.g30506;Chr17.g25603;Chr3.g19939;Chr8.g54496;Chr15.g03263;Contig22.g58910;Chr10.g15442;Chr13.g22854;Chr14.g49660;Chr17.g26035;Chr17.g26034;Chr15.g02613;Chr7.g33268;Chr14.g49769;Chr8.g53950;Chr8.g56103;Chr1.g57987;Chr16.g30940;Chr6.g51621;Chr11.g…
MF	GO:0004497	monooxygenase activity	72	0.00042416	0	36	36	#43BB00	#F71E1E	Chr15.g03891;Chr11.g12151;Chr10.g14146;Chr5.g08158;Chr15.g02613;Chr10.g14121;Chr15.g01258;Chr14.g49769;Chr14.g50174;Chr6.g51956;Chr15.g02183;Chr3.g18314;Chr16.g30940;Chr16.g31089;Chr8.g53950;Chr7.g33502;Chr15.g02208;Chr11.g10561;Chr15.g02207;Chr2.g42275;Chr5.g08184;Chr14.g50295;Chr11.g10562;Chr5.g05994;Chr1.g57987;Chr10.g14148;Chr11.g10563;Chr7.g33268;Chr10.g14144;Chr11.g10063;Chr9.g44654;Chr3.g1…
MF	GO:0016798	hydrolase activity, acting on glycosyl bonds	85	0.0319737	-0.108465	42	43	#40BE00	#C6CDC6	Chr4.g38541;Chr3.g19983;Chr9.g46019;Chr12.g37225;Chr13.g23076;Chr10.g14845;Chr10.g14458;Chr16.g28599;Chr16.g28598;Chr11.g10793;Chr2.g42088;Chr10.g14801;Chr10.g13919;Chr13.g23593;Chr9.g46018;Chr8.g55565;Contig43.g59325;Chr12.g36060;Chr2.g42228;Chr16.g29181;Chr14.g47655;Chr7.g32534;Chr7.g32536;Chr14.g49312;Contig34.g59246;Chr7.g32533;Chr7.g32532;Chr13.g23684;Chr13.g21339;Chr5.g07905;Chr16.g31355;Ch…
MF	GO:0016829	lyase activity	69	0.008276	-0.120386	34	35	#40BE00	#C6CDC6	Chr1.g58312;Chr4.g38462;Chr3.g20012;Chr14.g47773;Chr11.g11869;Chr2.g41849;Chr1.g58311;Chr8.g55792;Chr16.g31089;Chr10.g14220;Chr4.g39447;Chr3.g18381;Chr12.g36029;Chr1.g58258;Chr5.g05875;Chr5.g05876;Chr10.g16772;Chr10.g17175;Chr3.g20332;Chr5.g09332;Chr14.g47781;Chr10.g17076;Chr17.g25518;Chr10.g17179;Chr3.g19715;Chr16.g31274;Chr17.g25603;Chr4.g38927;Chr6.g51446;Chr3.g18526;Chr3.g19602;Chr14.g49410;C…
MF	GO:0048037	cofactor binding	188	0.00042416	-0.145865	93	95	#40BE00	#C4CDC4	Chr17.g27784;Chr9.g45237;Chr2.g42636;Chr13.g22362;Chr16.g30514;Chr2.g42731;Chr2.g42135;Chr5.g08158;Chr9.g44287;Chr10.g13866;Chr8.g56009;Chr10.g17175;Chr10.g15215;Chr13.g24415;Chr14.g50095;Chr13.g24557;Chr11.g12614;Scaffold9.g34897;Chr5.g06994;Chr10.g13984;Chr14.g49410;Chr15.g04732;Chr6.g51516;Chr14.g49770;Chr17.g26222;Chr16.g30506;Chr17.g25603;Chr9.g44432;Chr17.g26020;Chr7.g32362;Chr12.g35261;Chr…
MF	GO:0016705	oxidoreductase activity,with incorporation or reduction of molecular oxygen	80	0.00044893	-0.223607	39	41	#40BE00	#C0CEC0	Chr15.g03891;Chr11.g12151;Chr5.g08158;Chr15.g02613;Chr10.g14121;Chr12.g35980;Chr14.g49769;Chr14.g50174;Chr6.g51956;Chr15.g02183;Chr3.g18314;Chr16.g30940;Chr1.g57987;Chr8.g53950;Chr10.g14148;Chr15.g02208;Chr3.g20313;Chr15.g02207;Chr2.g42275;Chr5.g08184;Chr14.g50295;Chr11.g10562;Chr15.g02994;Chr5.g05994;Chr15.g04608;Chr2.g42937;Chr11.g10563;Chr7.g33268;Chr10.g14144;Chr11.g10063;Chr10.g14146;Chr3.g1…
MF	GO:0005506	iron ion binding	71	0.00237483	-0.593391	33	38	#39C500	#AFD3AF	Chr11.g10363;Chr11.g12151;Chr15.g02613;Chr7.g33268;Chr13.g23459;Chr15.g01258;Chr14.g49769;Chr14.g50174;Chr6.g51956;Chr15.g02183;Chr3.g18314;Chr8.g53950;Chr7.g33502;Chr15.g02208;Chr11.g11731;Chr15.g02207;Chr2.g42275;Chr11.g10563;Chr14.g50295;Chr11.g10562;Chr1.g57987;Chr9.g46503;Chr16.g30940;Chr16.g28790;Chr11.g10063;Chr15.g04623;Chr3.g18433;Chr17.g26615;Chr15.g04608;Chr6.g51621;Chr5.g06333;Chr2.g4…
MF	GO:0016491	oxidoreductase activity	305	0.00613004	-0.744378	146	159	#37C700	#A7D5A7	Chr7.g34357;Chr15.g01400;Chr15.g02366;Chr1.g57403;Chr13.g22362;Chr1.g57279;Chr5.g06333;Chr14.g48663;Chr3.g18314;Chr4.g39864;Chr10.g16625;Chr2.g42731;Chr2.g42135;Chr3.g20313;Chr8.g55875;Chr10.g13866;Chr10.g15215;Chr3.g19518;Chr9.g46669;Chr10.g15064;Chr13.g24415;Chr11.g13284;Chr11.g10063;Chr11.g11338;Chr15.g04558;Chr5.g08802;Chr14.g47908;Scaffold9.g34897;Chr5.g06994;Chr10.g15047;Chr16.g29712;Chr15.…
MF	GO:0005504	fatty acid binding	6	0.0375192	-0.816497	2	4	#37C700	#A3D6A3	Chr8.g54233;Chr4.g39916;Chr4.g38350;Chr7.g32457;Chr16.g31368;Chr5.g07578
MF	GO:0046527	glucosyltransferase activity	35	0.00378978	-2.53546	10	25	#1AE400	#52EA52	Chr10.g14453;Chr16.g28599;Chr17.g25594;Chr3.g17976;Chr13.g22469;Chr11.g10368;Chr9.g46019;Chr9.g46018;Chr7.g34736;Contig43.g59325;Chr16.g28598;Chr10.g17114;Chr13.g21339;Chr15.g02866;Chr2.g42856;Chr16.g30606;Scaffold6.g21075;Chr16.g30628;Chr7.g34765;Chr15.g01394;Chr11.g13042;Chr9.g46023;Chr5.g05820;Chr4.g38267;Chr5.g09320;Chr2.g41899;Chr9.g46488;Chr3.g20737;Chr13.g23297;Chr10.g13919;Chr3.g20733;Chr…
MF	GO:0016762	xyloglucan:xyloglucosyl transferase activity	15	0.00042416	-3.87298	0	15	#04FA00	#13FA13	Chr4.g38267;Chr16.g30628;Chr13.g21339;Chr5.g05820;Chr13.g23297;Chr10.g13919;Chr16.g28598;Chr9.g46488;Chr2.g42856;Chr16.g28599;Chr9.g46019;Chr9.g46018;Chr16.g30606;Contig43.g59325;Chr9.g46023
MF	GO:0016758	transferase activity, transferring hexosyl groups	88	0.0227041	-4.05081	25	63	#02FC00	#0BFC0B	Chr9.g46798;Chr17.g24908;Chr17.g25594;Chr9.g46019;Chr9.g46018;Chr3.g20390;Chr14.g48899;Chr11.g09871;Chr17.g25894;Chr16.g30606;Chr13.g23688;Scaffold6.g21075;Chr17.g25873;Chr9.g46801;Chr11.g10550;Chr11.g13042;Chr4.g40369;Chr1.g57942;Chr9.g46488;Chr10.g13919;Chr10.g14361;Chr8.g55986;Chr11.g12727;Chr8.g55982;Chr17.g25867;Chr10.g16181;Contig43.g59325;Chr4.g38107;Chr10.g14259;Chr10.g17114;Chr10.g14257;…
MF	GO:0016757	transferase activity, transferring glycosyl groups	124	0.0198671	-4.31053	38	86	#00FF00	#00FF00	Chr9.g46798;Chr17.g24908;Chr17.g25594;Chr9.g46019;Chr9.g46018;Chr3.g20390;Chr7.g34736;Chr11.g09871;Chr17.g25894;Chr16.g30606;Chr13.g23688;Chr16.g29883;Scaffold6.g21075;Chr17.g25873;Chr9.g46801;Chr15.g04016;Chr11.g10550;Chr11.g13042;Chr4.g40369;Chr1.g57942;Chr4.g40850;Chr9.g46488;Chr10.g13919;Chr10.g14361;Chr8.g55986;Chr8.g55985;Chr8.g55982;Chr17.g25867;Chr15.g02423;Chr10.g16181;Chr2.g44046;Chr7.g…

## Sheet: Table S3
category	ID	term	count	adj_pval	zscore	up	down	seq_list
BP	GO:1902600	proton transmembrane transport	8	0.00305511	-2.82843	0	8	Scaffold23.g58950;Contig45.g59348;Scaffold26.g59082;Scaffold23.g58958;Chr8.g54863;Chr3.g18476;Scaffold26.g59060;Chr8.g54877
BP	GO:0098662	inorganic cation transmembrane transport	8	0.00401706	-2.82843	0	8	Scaffold23.g58950;Contig45.g59348;Scaffold26.g59082;Scaffold23.g58958;Chr8.g54863;Chr3.g18476;Scaffold26.g59060;Chr8.g54877
BP	GO:0098655	cation transmembrane transport	8	0.00401706	-2.82843	0	8	Scaffold23.g58950;Contig45.g59348;Scaffold26.g59082;Scaffold23.g58958;Chr8.g54863;Chr3.g18476;Scaffold26.g59060;Chr8.g54877
BP	GO:0015672	monovalent inorganic cation transport	8	0.00401706	-2.82843	0	8	Scaffold23.g58950;Contig45.g59348;Scaffold26.g59082;Scaffold23.g58958;Chr8.g54863;Chr3.g18476;Scaffold26.g59060;Chr8.g54877
BP	GO:0098660	inorganic ion transmembrane transport	8	0.00401706	-2.82843	0	8	Scaffold23.g58950;Contig45.g59348;Scaffold26.g59082;Scaffold23.g58958;Chr8.g54863;Chr3.g18476;Scaffold26.g59060;Chr8.g54877
BP	GO:0006754	ATP biosynthetic process	5	0.00405063	-2.23607	0	5	Scaffold26.g59082;Scaffold23.g58958;Scaffold23.g58950;Scaffold26.g59060;Contig45.g59348
BP	GO:0015985	energy coupled proton transport, down electrochemical gradient	5	0.00405063	-2.23607	0	5	Scaffold26.g59082;Scaffold23.g58958;Scaffold23.g58950;Scaffold26.g59060;Contig45.g59348
BP	GO:0015986	ATP synthesis coupled proton transport	5	0.00405063	-2.23607	0	5	Scaffold26.g59082;Scaffold23.g58958;Scaffold23.g58950;Scaffold26.g59060;Contig45.g59348
BP	GO:0006812	cation transport	11	0.00540297	-2.11058	2	9	Scaffold26.g59060;Chr3.g18476;Scaffold26.g59082;Scaffold23.g58958;Chr8.g54863;Contig45.g59348;Chr16.g28825;Chr10.g13702;Scaffold23.g58950;Chr8.g54877;Chr13.g24303
BP	GO:0009144	purine nucleoside triphosphate metabolic process	5	0.00713199	-2.23607	0	5	Scaffold26.g59082;Scaffold23.g58958;Scaffold23.g58950;Scaffold26.g59060;Contig45.g59348
BP	GO:0009145	purine nucleoside triphosphate biosynthetic process	5	0.00713199	-2.23607	0	5	Scaffold26.g59082;Scaffold23.g58958;Scaffold23.g58950;Scaffold26.g59060;Contig45.g59348
BP	GO:0009206	purine ribonucleoside triphosphate biosynthetic process	5	0.00713199	-2.23607	0	5	Scaffold26.g59082;Scaffold23.g58958;Scaffold23.g58950;Scaffold26.g59060;Contig45.g59348
BP	GO:0009205	purine ribonucleoside triphosphate metabolic process	5	0.00713199	-2.23607	0	5	Scaffold26.g59082;Scaffold23.g58958;Scaffold23.g58950;Scaffold26.g59060;Contig45.g59348
BP	GO:0034220	ion transmembrane transport	8	0.00794822	-2.82843	0	8	Scaffold23.g58950;Contig45.g59348;Scaffold26.g59082;Scaffold23.g58958;Chr8.g54863;Chr3.g18476;Scaffold26.g59060;Chr8.g54877
BP	GO:0009142	nucleoside triphosphate biosynthetic process	5	0.0133443	-2.23607	0	5	Scaffold26.g59082;Scaffold23.g58958;Scaffold23.g58950;Scaffold26.g59060;Contig45.g59348
BP	GO:0009199	ribonucleoside triphosphate metabolic process	5	0.0133443	-2.23607	0	5	Scaffold26.g59082;Scaffold23.g58958;Scaffold23.g58950;Scaffold26.g59060;Contig45.g59348
BP	GO:0009201	ribonucleoside triphosphate biosynthetic process	5	0.0133443	-2.23607	0	5	Scaffold26.g59082;Scaffold23.g58958;Scaffold23.g58950;Scaffold26.g59060;Contig45.g59348
BP	GO:0046034	ATP metabolic process	6	0.0198851	-2.44949	0	6	Scaffold23.g58950;Contig45.g59348;Scaffold26.g59082;Scaffold23.g58958;Chr3.g18476;Scaffold26.g59060
BP	GO:0009060	aerobic respiration	3	0.0219762	-1.73205	0	3	Chr4.g39028;Chr3.g18476;Scaffold26.g59049
BP	GO:0009141	nucleoside triphosphate metabolic process	5	0.0269995	-2.23607	0	5	Scaffold26.g59082;Scaffold23.g58958;Scaffold23.g58950;Scaffold26.g59060;Contig45.g59348
BP	GO:0045333	cellular respiration	3	0.0349193	-1.73205	0	3	Chr4.g39028;Chr3.g18476;Scaffold26.g59049
BP	GO:0006811	ion transport	11	0.0349193	-2.11058	2	9	Scaffold26.g59060;Chr3.g18476;Scaffold26.g59082;Scaffold23.g58958;Chr8.g54863;Contig45.g59348;Chr16.g28825;Chr10.g13702;Scaffold23.g58950;Chr8.g54877;Chr13.g24303
BP	GO:0019646	aerobic electron transport chain	2	0.048976	-1.41421	0	2	Chr4.g39028;Scaffold26.g59049
CC	GO:0045263	proton-transporting ATP synthase complex, coupling factor F(o)	3	0.0122918	-1.73205	0	3	Scaffold26.g59082;Scaffold23.g58958;Scaffold26.g59060
CC	GO:0005739	mitochondrion	11	0.0349788	-1.50756	3	8	Scaffold17.g58693;Chr15.g01827;Scaffold23.g58958;Chr4.g39070;Chr17.g26660;Chr17.g26218;Scaffold2.g05336;Contig45.g59348;Scaffold26.g59049;Chr11.g10841;Chr4.g39028
MF	GO:0015078	proton transmembrane transporter activity	11	0.00277656	-2.7136	1	10	Chr5.g07266;Scaffold26.g59060;Contig45.g59348;Scaffold26.g59074;Scaffold26.g59082;Scaffold23.g58958;Chr8.g54863;Chr3.g18476;Scaffold26.g59049;Scaffold23.g58950;Chr8.g54877
MF	GO:0032559	adenyl ribonucleotide binding	62	0.00277656	4.572	49	13	Chr15.g00302;Scaffold23.g58950;Chr5.g07303;Chr5.g05918;Scaffold23.g58958;Chr4.g38481;Chr12.g37280;Chr17.g26858;Chr2.g42221;Chr1.g58051;Chr14.g50173;Chr5.g06563;Chr11.g12950;Chr5.g05996;Chr2.g41469;Chr9.g46500;Chr3.g18020;Chr6.g51404;Chr17.g26218;Chr6.g51984;Chr6.g51986;Chr17.g25212;Chr3.g18009;Chr10.g13740;Chr17.g27772;Chr17.g27757;Chr1.g57734;Chr11.g09851;Chr16.g28825;Chr3.g18183;Chr8.g54877;Chr…
MF	GO:0030554	adenyl nucleotide binding	62	0.00277656	4.572	49	13	Chr15.g00302;Scaffold23.g58950;Chr5.g07303;Chr5.g05918;Scaffold23.g58958;Chr4.g38481;Chr12.g37280;Chr17.g26858;Chr2.g42221;Chr1.g58051;Chr14.g50173;Chr5.g06563;Chr11.g12950;Chr5.g05996;Chr2.g41469;Chr9.g46500;Chr3.g18020;Chr6.g51404;Chr17.g26218;Chr6.g51984;Chr6.g51986;Chr17.g25212;Chr3.g18009;Chr10.g13740;Chr17.g27772;Chr17.g27757;Chr1.g57734;Chr11.g09851;Chr16.g28825;Chr3.g18183;Chr8.g54877;Chr…
MF	GO:0043168	anion binding	70	0.00401706	4.06378	52	18	Chr15.g00302;Scaffold23.g58950;Chr5.g07303;Chr5.g05918;Scaffold23.g58958;Chr11.g10381;Chr4.g38481;Chr12.g37280;Chr17.g26858;Chr2.g42221;Chr1.g58051;Chr14.g50173;Chr5.g06563;Chr11.g12950;Chr5.g05996;Chr2.g41469;Chr9.g46500;Chr15.g04759;Chr6.g51404;Chr17.g26218;Chr6.g51984;Chr6.g51986;Chr17.g25212;Chr3.g18009;Chr10.g13740;Chr17.g27772;Chr17.g27757;Chr1.g57734;Chr11.g09851;Chr7.g32457;Chr16.g28825;C…
MF	GO:0032555	purine ribonucleotide binding	63	0.00401706	4.40959	49	14	Chr15.g00302;Scaffold23.g58950;Chr5.g07303;Chr5.g05918;Scaffold23.g58958;Chr4.g38481;Chr12.g37280;Chr17.g26858;Chr2.g42221;Chr1.g58051;Chr14.g50173;Chr5.g06563;Chr11.g12950;Chr5.g05996;Chr2.g41469;Chr9.g46500;Chr3.g18020;Chr6.g51404;Chr17.g26218;Chr6.g51984;Chr6.g51986;Chr17.g25212;Chr3.g18009;Chr10.g13740;Chr17.g27772;Chr17.g27757;Chr1.g57734;Chr11.g09851;Chr16.g28825;Chr3.g18183;Chr8.g54877;Chr…
MF	GO:0017076	purine nucleotide binding	63	0.00401706	4.40959	49	14	Chr15.g00302;Scaffold23.g58950;Chr5.g07303;Chr5.g05918;Scaffold23.g58958;Chr4.g38481;Chr12.g37280;Chr17.g26858;Chr2.g42221;Chr1.g58051;Chr14.g50173;Chr5.g06563;Chr11.g12950;Chr5.g05996;Chr2.g41469;Chr9.g46500;Chr3.g18020;Chr6.g51404;Chr17.g26218;Chr6.g51984;Chr6.g51986;Chr17.g25212;Chr3.g18009;Chr10.g13740;Chr17.g27772;Chr17.g27757;Chr1.g57734;Chr11.g09851;Chr16.g28825;Chr3.g18183;Chr8.g54877;Chr…
MF	GO:0004097	catechol oxidase activity	4	0.00452776	-2	0	4	Chr10.g14144;Chr5.g06006;Chr10.g14121;Chr5.g05994
MF	GO:0032553	ribonucleotide binding	63	0.00452776	4.40959	49	14	Chr15.g00302;Scaffold23.g58950;Chr5.g07303;Chr5.g05918;Scaffold23.g58958;Chr4.g38481;Chr12.g37280;Chr17.g26858;Chr2.g42221;Chr1.g58051;Chr14.g50173;Chr5.g06563;Chr11.g12950;Chr5.g05996;Chr2.g41469;Chr9.g46500;Chr3.g18020;Chr6.g51404;Chr17.g26218;Chr6.g51984;Chr6.g51986;Chr17.g25212;Chr3.g18009;Chr10.g13740;Chr17.g27772;Chr17.g27757;Chr1.g57734;Chr11.g09851;Chr16.g28825;Chr3.g18183;Chr8.g54877;Chr…
MF	GO:0097367	carbohydrate derivative binding	63	0.00481927	4.40959	49	14	Chr15.g00302;Scaffold23.g58950;Chr5.g07303;Chr5.g05918;Scaffold23.g58958;Chr4.g38481;Chr12.g37280;Chr17.g26858;Chr2.g42221;Chr1.g58051;Chr14.g50173;Chr5.g06563;Chr11.g12950;Chr5.g05996;Chr2.g41469;Chr9.g46500;Chr3.g18020;Chr6.g51404;Chr17.g26218;Chr6.g51984;Chr6.g51986;Chr17.g25212;Chr3.g18009;Chr10.g13740;Chr17.g27772;Chr17.g27757;Chr1.g57734;Chr11.g09851;Chr16.g28825;Chr3.g18183;Chr8.g54877;Chr…
MF	GO:0015077	monovalent inorganic cation transmembrane transporter activity	11	0.00549536	-2.7136	1	10	Chr5.g07266;Scaffold26.g59060;Contig45.g59348;Scaffold26.g59074;Scaffold26.g59082;Scaffold23.g58958;Chr8.g54863;Chr3.g18476;Scaffold26.g59049;Scaffold23.g58950;Chr8.g54877
MF	GO:1901265	nucleoside phosphate binding	66	0.00713199	4.18511	50	16	Chr15.g00302;Scaffold23.g58950;Chr5.g07303;Chr10.g17317;Chr5.g05918;Scaffold23.g58958;Chr5.g08163;Chr4.g38481;Chr12.g37280;Chr17.g26858;Chr2.g42221;Chr1.g58051;Chr14.g50173;Chr5.g06563;Chr11.g12950;Chr5.g05996;Chr2.g41469;Chr9.g46500;Chr15.g04759;Chr6.g51404;Chr17.g26218;Chr6.g51984;Chr6.g51986;Chr17.g25212;Chr3.g18009;Chr10.g13740;Chr17.g27772;Chr17.g27757;Chr1.g57734;Chr11.g09851;Chr16.g28825;C…
MF	GO:0000166	nucleotide binding	66	0.00713199	4.18511	50	16	Chr15.g00302;Scaffold23.g58950;Chr5.g07303;Chr10.g17317;Chr5.g05918;Scaffold23.g58958;Chr5.g08163;Chr4.g38481;Chr12.g37280;Chr17.g26858;Chr2.g42221;Chr1.g58051;Chr14.g50173;Chr5.g06563;Chr11.g12950;Chr5.g05996;Chr2.g41469;Chr9.g46500;Chr15.g04759;Chr6.g51404;Chr17.g26218;Chr6.g51984;Chr6.g51986;Chr17.g25212;Chr3.g18009;Chr10.g13740;Chr17.g27772;Chr17.g27757;Chr1.g57734;Chr11.g09851;Chr16.g28825;C…
MF	GO:0036094	small molecule binding	68	0.00908324	4.36564	52	16	Chr15.g00302;Scaffold23.g58950;Chr5.g07303;Chr10.g17317;Chr5.g05918;Scaffold23.g58958;Chr5.g08163;Chr4.g38481;Chr12.g37280;Chr17.g26858;Chr2.g42221;Chr1.g58051;Chr14.g50173;Chr5.g06563;Chr11.g12950;Chr5.g05996;Chr2.g41469;Chr9.g46500;Chr15.g04759;Chr6.g51404;Chr17.g26218;Chr6.g51984;Chr6.g51986;Chr17.g25212;Chr3.g18009;Chr10.g13740;Chr17.g27772;Chr17.g27757;Chr1.g57734;Chr11.g09851;Chr7.g32457;Ch…
MF	GO:0022890	inorganic cation transmembrane transporter activity	13	0.0122918	-1.94145	3	10	Chr5.g07266;Scaffold26.g59060;Chr3.g18476;Scaffold26.g59074;Scaffold26.g59082;Scaffold23.g58958;Chr8.g54863;Contig45.g59348;Chr16.g28825;Scaffold26.g59049;Scaffold23.g58950;Chr8.g54877;Chr13.g22599
MF	GO:0019829	ATPase-coupled cation transmembrane transporter activity	7	0.0133443	-1.13389	2	5	Scaffold23.g58950;Chr16.g28825;Scaffold23.g58958;Chr8.g54863;Contig45.g59348;Chr8.g54877;Chr13.g22599
MF	GO:0004503	monophenol monooxygenase activity	3	0.0133443	-1.73205	0	3	Chr10.g14144;Chr10.g14121;Chr5.g05994
MF	GO:0016716	oxidoreductase activity, acting on paired donors, with incorporation or reduction of molecular oxygen, another compound as one donor, and incorporation of one atom of oxygen	3	0.0133443	-1.73205	0	3	Chr10.g14144;Chr10.g14121;Chr5.g05994
MF	GO:0042625	ATPase-coupled ion transmembrane transporter activity	7	0.0194129	-1.13389	2	5	Scaffold23.g58950;Chr16.g28825;Scaffold23.g58958;Chr8.g54863;Contig45.g59348;Chr8.g54877;Chr13.g22599
MF	GO:0003939	L-iditol 2-dehydrogenase activity	3	0.0194129	-1.73205	0	3	Chr7.g31958;Chr1.g56757;Chr1.g56758
MF	GO:0005524	ATP binding	52	0.0198851	3.60555	39	13	Chr15.g00302;Scaffold23.g58950;Chr5.g07303;Chr5.g05918;Scaffold23.g58958;Chr4.g38481;Chr17.g25212;Chr17.g26858;Chr2.g42221;Chr1.g58051;Chr14.g50173;Chr5.g06563;Chr11.g12950;Chr5.g05996;Chr9.g46500;Chr3.g18020;Chr6.g51404;Chr17.g26218;Chr6.g51984;Chr6.g51986;Chr3.g18009;Chr10.g13740;Chr11.g09914;Chr17.g27757;Chr1.g57734;Chr16.g28825;Chr17.g27772;Chr8.g54877;Chr14.g49675;Chr5.g08906;Chr13.g22599;Ch…
MF	GO:0003824	catalytic activity	173	0.0213649	0.380143	89	84	Chr15.g00302;Chr5.g06050;Chr3.g20492;Chr2.g42221;Chr10.g14257;Chr7.g32339;Chr3.g20313;Chr10.g14823;Chr8.g55504;Chr1.g58134;Chr17.g25364;Chr17.g27757;Chr3.g18114;Scaffold26.g59074;Chr3.g20012;Chr9.g45465;Chr10.g13740;Chr12.g35513;Chr2.g41835;Chr10.g13989;Chr3.g18476;Chr10.g13985;Chr16.g29461;Chr4.g38661;Chr11.g10394;Chr1.g56758;Chr7.g34065;Chr1.g58121;Chr10.g14833;Chr4.g38481;Chr1.g58124;Chr1.g579…
MF	GO:0043531	ADP binding	12	0.0418458	2.88675	11	1	Chr10.g14872;Chr7.g32015;Chr11.g10394;Chr11.g09851;Chr9.g47183;Contig27.g59106;Chr3.g18183;Chr2.g41457;Chr17.g25152;Chr7.g34704;Chr5.g07640;Chr2.g41469
MF	GO:0008144	drug binding	52	0.0457382	3.60555	39	13	Chr15.g00302;Scaffold23.g58950;Chr5.g07303;Chr5.g05918;Scaffold23.g58958;Chr4.g38481;Chr17.g25212;Chr17.g26858;Chr2.g42221;Chr1.g58051;Chr14.g50173;Chr5.g06563;Chr11.g12950;Chr5.g05996;Chr9.g46500;Chr3.g18020;Chr6.g51404;Chr17.g26218;Chr6.g51984;Chr6.g51986;Chr3.g18009;Chr10.g13740;Chr11.g09914;Chr17.g27757;Chr1.g57734;Chr16.g28825;Chr17.g27772;Chr8.g54877;Chr14.g49675;Chr5.g08906;Chr13.g22599;Ch…
MF	GO:0016682	oxidoreductase activity, acting on diphenols and related substances as donors, oxygen as acceptor	5	0.0499807	-2.23607	0	5	Chr10.g14144;Chr5.g06006;Chr7.g32417;Chr10.g14121;Chr5.g05994

## Sheet: Table S4
category	ID	term	count	genes	logFC	adj_pval	zscore
Genetic Information Processing	map03010	Ribosome	132	Chr1.g57407	1.26554	6.60981e-29	10.9669
Genetic Information Processing	map03010	Ribosome	132	Chr17.g24825	1.2951	6.60981e-29	10.9669
Genetic Information Processing	map03010	Ribosome	132	Chr14.g48156	1.31229	6.60981e-29	10.9669
Genetic Information Processing	map03010	Ribosome	132	Chr8.g54753	1.19095	6.60981e-29	10.9669
Genetic Information Processing	map03010	Ribosome	132	Chr14.g47980	1.15687	6.60981e-29	10.9669
Genetic Information Processing	map03010	Ribosome	132	Chr3.g19921	1.2953	6.60981e-29	10.9669
Genetic Information Processing	map03010	Ribosome	132	Contig1.g04961	2.1615	6.60981e-29	10.9669
Genetic Information Processing	map03010	Ribosome	132	Chr8.g55711	1.2513	6.60981e-29	10.9669
Genetic Information Processing	map03010	Ribosome	132	Chr4.g38806	1.38178	6.60981e-29	10.9669
Genetic Information Processing	map03010	Ribosome	132	Chr2.g42878	1.51784	6.60981e-29	10.9669
Genetic Information Processing	map03010	Ribosome	132	Chr5.g06331	1.04578	6.60981e-29	10.9669
Genetic Information Processing	map03010	Ribosome	132	Chr13.g22924	1.15235	6.60981e-29	10.9669
Genetic Information Processing	map03010	Ribosome	132	Chr17.g24660	1.58078	6.60981e-29	10.9669
Genetic Information Processing	map03010	Ribosome	132	Chr9.g46806	1.27941	6.60981e-29	10.9669
Genetic Information Processing	map03010	Ribosome	132	Chr1.g57477	1.31803	6.60981e-29	10.9669
Genetic Information Processing	map03010	Ribosome	132	Chr14.g47809	1.20578	6.60981e-29	10.9669
Genetic Information Processing	map03010	Ribosome	132	Chr7.g31944	1.30647	6.60981e-29	10.9669
Genetic Information Processing	map03010	Ribosome	132	Chr16.g29256	1.00723	6.60981e-29	10.9669
Genetic Information Processing	map03010	Ribosome	132	Chr6.g50949	1.04906	6.60981e-29	10.9669
Genetic Information Processing	map03010	Ribosome	132	Chr10.g15203	1.00882	6.60981e-29	10.9669
Genetic Information Processing	map03010	Ribosome	132	Chr13.g22497	1.10191	6.60981e-29	10.9669
Genetic Information Processing	map03010	Ribosome	132	Chr1.g56449	1.4984	6.60981e-29	10.9669
Genetic Information Processing	map03010	Ribosome	132	Chr9.g46955	1.32728	6.60981e-29	10.9669
Genetic Information Processing	map03010	Ribosome	132	Chr7.g32724	-5.6504	6.60981e-29	10.9669
Genetic Information Processing	map03010	Ribosome	132	Chr10.g15380	1.31124	6.60981e-29	10.9669
Genetic Information Processing	map03010	Ribosome	132	Chr11.g10816	1.28971	6.60981e-29	10.9669
Genetic Information Processing	map03010	Ribosome	132	Chr3.g17611	1.16399	6.60981e-29	10.9669
Genetic Information Processing	map03010	Ribosome	132	Chr10.g14650	1.13096	6.60981e-29	10.9669
Genetic Information Processing	map03010	Ribosome	132	Chr13.g22380	1.28762	6.60981e-29	10.9669
Genetic Information Processing	map03010	Ribosome	132	Chr16.g30578	1.10489	6.60981e-29	10.9669
Genetic Information Processing	map03010	Ribosome	132	Chr2.g41190	1.50242	6.60981e-29	10.9669
Genetic Information Processing	map03010	Ribosome	132	Chr3.g17595	1.39321	6.60981e-29	10.9669
Genetic Information Processing	map03010	Ribosome	132	Chr3.g17619	1.1556	6.60981e-29	10.9669
Genetic Information Processing	map03010	Ribosome	132	Chr12.g36289	1.30174	6.60981e-29	10.9669
Genetic Information Processing	map03010	Ribosome	132	Chr17.g26133	1.1528	6.60981e-29	10.9669
Genetic Information Processing	map03010	Ribosome	132	Chr7.g32049	1.31354	6.60981e-29	10.9669
Genetic Information Processing	map03010	Ribosome	132	Chr4.g39960	1.10131	6.60981e-29	10.9669
Genetic Information Processing	map03010	Ribosome	132	Chr3.g17853	1.51044	6.60981e-29	10.9669
Genetic Information Processing	map03010	Ribosome	132	Chr3.g17851	1.09458	6.60981e-29	10.9669
Genetic Information Processing	map03010	Ribosome	132	Chr11.g10801	1.05485	6.60981e-29	10.9669
Genetic Information Processing	map03010	Ribosome	132	Chr11.g11298	1.21841	6.60981e-29	10.9669
Genetic Information Processing	map03010	Ribosome	132	Chr9.g46439	-6.26099	6.60981e-29	10.9669
Genetic Information Processing	map03010	Ribosome	132	Chr16.g30373	1.19221	6.60981e-29	10.9669
Genetic Information Processing	map03010	Ribosome	132	Chr15.g03494	1.17219	6.60981e-29	10.9669
Genetic Information Processing	map03010	Ribosome	132	Chr11.g13355	1.34734	6.60981e-29	10.9669
Genetic Information Processing	map03010	Ribosome	132	Scaffold18.g58754	1.11956	6.60981e-29	10.9669
Genetic Information Processing	map03010	Ribosome	132	Chr16.g29567	1.00425	6.60981e-29	10.9669
Genetic Information Processing	map03010	Ribosome	132	Chr5.g06270	1.03647	6.60981e-29	10.9669
Genetic Information Processing	map03010	Ribosome	132	Scaffold1.g05196	1.39503	6.60981e-29	10.9669
Genetic Information Processing	map03010	Ribosome	132	Chr11.g12029	1.05476	6.60981e-29	10.9669
Genetic Information Processing	map03010	Ribosome	132	Chr1.g56437	1.86826	6.60981e-29	10.9669
Genetic Information Processing	map03010	Ribosome	132	Scaffold17.g58700	-2.0643	6.60981e-29	10.9669
Genetic Information Processing	map03010	Ribosome	132	Chr17.g27595	1.76957	6.60981e-29	10.9669
Genetic Information Processing	map03010	Ribosome	132	Chr12.g34953	1.43504	6.60981e-29	10.9669
Genetic Information Processing	map03010	Ribosome	132	Chr5.g07533	1.11659	6.60981e-29	10.9669
Genetic Information Processing	map03010	Ribosome	132	Chr4.g38297	1.20059	6.60981e-29	10.9669
Genetic Information Processing	map03010	Ribosome	132	Chr10.g14472	1.0444	6.60981e-29	10.9669
Genetic Information Processing	map03010	Ribosome	132	Chr10.g14475	1.13711	6.60981e-29	10.9669
Genetic Information Processing	map03010	Ribosome	132	Chr16.g29877	1.26217	6.60981e-29	10.9669
Genetic Information Processing	map03010	Ribosome	132	Chr4.g39596	1.07042	6.60981e-29	10.9669
Genetic Information Processing	map03010	Ribosome	132	Chr1.g57218	1.70932	6.60981e-29	10.9669
Genetic Information Processing	map03010	Ribosome	132	Chr4.g38755	1.35806	6.60981e-29	10.9669
Genetic Information Processing	map03010	Ribosome	132	Chr1.g57190	1.14813	6.60981e-29	10.9669
Genetic Information Processing	map03010	Ribosome	132	Chr4.g39763	1.03554	6.60981e-29	10.9669
Genetic Information Processing	map03010	Ribosome	132	Chr12.g37546	1.83252	6.60981e-29	10.9669
Genetic Information Processing	map03010	Ribosome	132	Chr10.g15489	1.21406	6.60981e-29	10.9669
Genetic Information Processing	map03010	Ribosome	132	Chr10.g15483	1.41317	6.60981e-29	10.9669
Genetic Information Processing	map03010	Ribosome	132	Chr11.g13130	1.05959	6.60981e-29	10.9669
Genetic Information Processing	map03010	Ribosome	132	Chr12.g37513	1.1605	6.60981e-29	10.9669
Genetic Information Processing	map03010	Ribosome	132	Chr4.g38612	1.11677	6.60981e-29	10.9669
Genetic Information Processing	map03010	Ribosome	132	Chr9.g47384	1.38226	6.60981e-29	10.9669
Genetic Information Processing	map03010	Ribosome	132	Chr9.g47343	1.16048	6.60981e-29	10.9669
Genetic Information Processing	map03010	Ribosome	132	Chr7.g31530	1.1081	6.60981e-29	10.9669
Genetic Information Processing	map03010	Ribosome	132	Chr16.g30005	1.22958	6.60981e-29	10.9669
Genetic Information Processing	map03010	Ribosome	132	Chr13.g22734	1.4926	6.60981e-29	10.9669
Genetic Information Processing	map03010	Ribosome	132	Chr3.g19555	1.50374	6.60981e-29	10.9669
Genetic Information Processing	map03010	Ribosome	132	Chr14.g48199	1.07481	6.60981e-29	10.9669
Genetic Information Processing	map03010	Ribosome	132	Chr4.g38515	1.63607	6.60981e-29	10.9669
Genetic Information Processing	map03010	Ribosome	132	Chr6.g52821	1.44526	6.60981e-29	10.9669
Genetic Information Processing	map03010	Ribosome	132	Chr9.g46964	1.03894	6.60981e-29	10.9669
Genetic Information Processing	map03010	Ribosome	132	Chr16.g30787	1.11186	6.60981e-29	10.9669
Genetic Information Processing	map03010	Ribosome	132	Chr7.g34774	1.00458	6.60981e-29	10.9669
Genetic Information Processing	map03010	Ribosome	132	Chr14.g48107	1.55131	6.60981e-29	10.9669
Genetic Information Processing	map03010	Ribosome	132	Chr13.g22358	1.1421	6.60981e-29	10.9669
Genetic Information Processing	map03010	Ribosome	132	Chr1.g57387	1.35271	6.60981e-29	10.9669
Genetic Information Processing	map03010	Ribosome	132	Chr5.g06281	1.19054	6.60981e-29	10.9669
Genetic Information Processing	map03010	Ribosome	132	Chr6.g51140	1.09712	6.60981e-29	10.9669
Genetic Information Processing	map03010	Ribosome	132	Chr15.g04489	1.05002	6.60981e-29	10.9669
Genetic Information Processing	map03010	Ribosome	132	Chr7.g31561	1.28256	6.60981e-29	10.9669
Genetic Information Processing	map03010	Ribosome	132	Chr7.g32689	1.04619	6.60981e-29	10.9669
Genetic Information Processing	map03010	Ribosome	132	Chr7.g32035	2.01811	6.60981e-29	10.9669
Genetic Information Processing	map03010	Ribosome	132	Chr12.g35339	1.82783	6.60981e-29	10.9669
Genetic Information Processing	map03010	Ribosome	132	Chr15.g00803	1.30898	6.60981e-29	10.9669
Genetic Information Processing	map03010	Ribosome	132	Chr4.g38144	1.14695	6.60981e-29	10.9669
Genetic Information Processing	map03010	Ribosome	132	Chr11.g13327	1.09809	6.60981e-29	10.9669
Genetic Information Processing	map03010	Ribosome	132	Chr7.g32607	1.16024	6.60981e-29	10.9669
Genetic Information Processing	map03010	Ribosome	132	Chr3.g19481	1.27464	6.60981e-29	10.9669
Genetic Information Processing	map03010	Ribosome	132	Chr11.g10919	1.40433	6.60981e-29	10.9669
Genetic Information Processing	map03010	Ribosome	132	Chr13.g23618	1.1822	6.60981e-29	10.9669
Genetic Information Processing	map03010	Ribosome	132	Contig12.g41063	1.60206	6.60981e-29	10.9669
Genetic Information Processing	map03010	Ribosome	132	Chr7.g33548	1.12392	6.60981e-29	10.9669
Genetic Information Processing	map03010	Ribosome	132	Chr6.g52970	1.19727	6.60981e-29	10.9669
Genetic Information Processing	map03010	Ribosome	132	Chr2.g42754	1.22423	6.60981e-29	10.9669
Genetic Information Processing	map03010	Ribosome	132	Chr8.g54205	1.00122	6.60981e-29	10.9669
Genetic Information Processing	map03010	Ribosome	132	Chr6.g52466	1.47966	6.60981e-29	10.9669
Genetic Information Processing	map03010	Ribosome	132	Chr15.g00153	1.85149	6.60981e-29	10.9669
Genetic Information Processing	map03010	Ribosome	132	Chr10.g14802	1.21912	6.60981e-29	10.9669
Genetic Information Processing	map03010	Ribosome	132	Chr6.g52279	1.23531	6.60981e-29	10.9669
Genetic Information Processing	map03010	Ribosome	132	Chr1.g56390	1.62405	6.60981e-29	10.9669
Genetic Information Processing	map03010	Ribosome	132	Contig2.g05602	3.15064	6.60981e-29	10.9669
Genetic Information Processing	map03010	Ribosome	132	Chr1.g58365	3.46195	6.60981e-29	10.9669
Genetic Information Processing	map03010	Ribosome	132	Chr10.g14430	1.70696	6.60981e-29	10.9669
Genetic Information Processing	map03010	Ribosome	132	Chr3.g20031	1.13551	6.60981e-29	10.9669
Genetic Information Processing	map03010	Ribosome	132	Chr1.g56414	1.00088	6.60981e-29	10.9669
Genetic Information Processing	map03010	Ribosome	132	Chr1.g57714	1.0702	6.60981e-29	10.9669
Genetic Information Processing	map03010	Ribosome	132	Chr14.g47862	1.35254	6.60981e-29	10.9669
Genetic Information Processing	map03010	Ribosome	132	Chr14.g50167	1.03636	6.60981e-29	10.9669
Genetic Information Processing	map03010	Ribosome	132	Chr2.g41367	1.03154	6.60981e-29	10.9669
Genetic Information Processing	map03010	Ribosome	132	Chr5.g06734	1.19581	6.60981e-29	10.9669
Genetic Information Processing	map03010	Ribosome	132	Chr2.g42100	1.04318	6.60981e-29	10.9669
Genetic Information Processing	map03010	Ribosome	132	Chr7.g31635	1.20387	6.60981e-29	10.9669
Genetic Information Processing	map03010	Ribosome	132	Chr17.g25157	1.43646	6.60981e-29	10.9669
Genetic Information Processing	map03010	Ribosome	132	Chr13.g23194	1.3295	6.60981e-29	10.9669
Genetic Information Processing	map03010	Ribosome	132	Chr5.g08897	1.35502	6.60981e-29	10.9669
Genetic Information Processing	map03010	Ribosome	132	Chr17.g26479	1.00897	6.60981e-29	10.9669
Genetic Information Processing	map03010	Ribosome	132	Chr8.g54374	1.11218	6.60981e-29	10.9669
Genetic Information Processing	map03010	Ribosome	132	Chr4.g38503	1.36019	6.60981e-29	10.9669
Genetic Information Processing	map03010	Ribosome	132	Chr12.g36497	1.17644	6.60981e-29	10.9669
Genetic Information Processing	map03010	Ribosome	132	Chr9.g45295	1.00748	6.60981e-29	10.9669
Genetic Information Processing	map03010	Ribosome	132	Chr2.g41671	1.26353	6.60981e-29	10.9669
Genetic Information Processing	map03010	Ribosome	132	Chr7.g32625	1.17889	6.60981e-29	10.9669
Genetic Information Processing	map03010	Ribosome	132	Chr13.g23883	1.21028	6.60981e-29	10.9669
Metabolism	map00196	Photosynthesis - antenna proteins	17	Chr17.g26035	2.71813	3.03311e-08	4.12311
Metabolism	map00196	Photosynthesis - antenna proteins	17	Chr17.g26034	4.069	3.03311e-08	4.12311
Metabolism	map00196	Photosynthesis - antenna proteins	17	Chr17.g27784	1.36541	3.03311e-08	4.12311
Metabolism	map00196	Photosynthesis - antenna proteins	17	Chr10.g14455	2.5988	3.03311e-08	4.12311
Metabolism	map00196	Photosynthesis - antenna proteins	17	Chr10.g14454	1.1853	3.03311e-08	4.12311
Metabolism	map00196	Photosynthesis - antenna proteins	17	Chr15.g00321	1.40463	3.03311e-08	4.12311
Metabolism	map00196	Photosynthesis - antenna proteins	17	Contig22.g58910	2.17367	3.03311e-08	4.12311
Metabolism	map00196	Photosynthesis - antenna proteins	17	Chr12.g36001	1.91144	3.03311e-08	4.12311
Metabolism	map00196	Photosynthesis - antenna proteins	17	Chr9.g46287	2.64272	3.03311e-08	4.12311
Metabolism	map00196	Photosynthesis - antenna proteins	17	Chr3.g18379	1.91586	3.03311e-08	4.12311
Metabolism	map00196	Photosynthesis - antenna proteins	17	Chr11.g12614	2.00184	3.03311e-08	4.12311
Metabolism	map00196	Photosynthesis - antenna proteins	17	Chr5.g06309	3.4283	3.03311e-08	4.12311
Metabolism	map00196	Photosynthesis - antenna proteins	17	Chr5.g06308	1.91547	3.03311e-08	4.12311
Metabolism	map00196	Photosynthesis - antenna proteins	17	Chr17.g25854	1.01255	3.03311e-08	4.12311
Metabolism	map00196	Photosynthesis - antenna proteins	17	Chr9.g44287	1.21398	3.03311e-08	4.12311
Metabolism	map00196	Photosynthesis - antenna proteins	17	Chr14.g50095	1.7863	3.03311e-08	4.12311
Metabolism	map00196	Photosynthesis - antenna proteins	17	Chr8.g56009	2.17596	3.03311e-08	4.12311
Genetic Information Processing	map03030	DNA replication	31	Chr12.g37098	-6.40239	3.11762e-05	1.97566
Genetic Information Processing	map03030	DNA replication	31	Chr2.g42636	1.9408	3.11762e-05	1.97566
Genetic Information Processing	map03030	DNA replication	31	Chr15.g03949	1.49362	3.11762e-05	1.97566
Genetic Information Processing	map03030	DNA replication	31	Chr13.g23306	2.0906	3.11762e-05	1.97566
Genetic Information Processing	map03030	DNA replication	31	Chr5.g08789	2.02328	3.11762e-05	1.97566
Genetic Information Processing	map03030	DNA replication	31	Chr14.g50271	2.46281	3.11762e-05	1.97566
Genetic Information Processing	map03030	DNA replication	31	Chr15.g02263	1.44117	3.11762e-05	1.97566
Genetic Information Processing	map03030	DNA replication	31	Chr5.g06739	1.88499	3.11762e-05	1.97566
Genetic Information Processing	map03030	DNA replication	31	Chr8.g54821	-1.51848	3.11762e-05	1.97566
Genetic Information Processing	map03030	DNA replication	31	Chr5.g05621	-2.14642	3.11762e-05	1.97566
Genetic Information Processing	map03030	DNA replication	31	Chr6.g50754	1.74365	3.11762e-05	1.97566
Genetic Information Processing	map03030	DNA replication	31	Chr14.g50195	2.0728	3.11762e-05	1.97566
Genetic Information Processing	map03030	DNA replication	31	Chr16.g30216	2.03809	3.11762e-05	1.97566
Genetic Information Processing	map03030	DNA replication	31	Chr13.g23429	1.61771	3.11762e-05	1.97566
Genetic Information Processing	map03030	DNA replication	31	Chr5.g05761	-2.41267	3.11762e-05	1.97566
Genetic Information Processing	map03030	DNA replication	31	Chr15.g03492	1.14125	3.11762e-05	1.97566
Genetic Information Processing	map03030	DNA replication	31	Contig41.g59303	1.52753	3.11762e-05	1.97566
Genetic Information Processing	map03030	DNA replication	31	Chr1.g58564	1.28121	3.11762e-05	1.97566
Genetic Information Processing	map03030	DNA replication	31	Chr7.g34102	-1.21583	3.11762e-05	1.97566
Genetic Information Processing	map03030	DNA replication	31	Chr4.g40134	-5.48976	3.11762e-05	1.97566
Genetic Information Processing	map03030	DNA replication	31	Chr2.g41213	2.06953	3.11762e-05	1.97566
Genetic Information Processing	map03030	DNA replication	31	Chr11.g10517	2.72489	3.11762e-05	1.97566
Genetic Information Processing	map03030	DNA replication	31	Chr6.g51107	1.95918	3.11762e-05	1.97566
Genetic Information Processing	map03030	DNA replication	31	Chr10.g16710	1.57295	3.11762e-05	1.97566
Genetic Information Processing	map03030	DNA replication	31	Chr11.g10452	1.87178	3.11762e-05	1.97566
Genetic Information Processing	map03030	DNA replication	31	Chr15.g02953	1.01761	3.11762e-05	1.97566
Genetic Information Processing	map03030	DNA replication	31	Contig2.g05590	-2.17836	3.11762e-05	1.97566
Genetic Information Processing	map03030	DNA replication	31	Chr5.g08937	-6.24482	3.11762e-05	1.97566
Genetic Information Processing	map03030	DNA replication	31	Chr5.g08871	-5.46041	3.11762e-05	1.97566
Genetic Information Processing	map03030	DNA replication	31	Chr5.g06324	2.03887	3.11762e-05	1.97566
Genetic Information Processing	map03030	DNA replication	31	Chr13.g24548	-2.79782	3.11762e-05	1.97566
Metabolism	map00950	Isoquinoline alkaloid biosynthesis	15	Chr1.g58312	6.65811	0.00428609	2.84019
Metabolism	map00950	Isoquinoline alkaloid biosynthesis	15	Chr1.g58311	5.01325	0.00428609	2.84019
Metabolism	map00950	Isoquinoline alkaloid biosynthesis	15	Chr10.g14148	1.76021	0.00428609	2.84019
Metabolism	map00950	Isoquinoline alkaloid biosynthesis	15	Chr5.g06005	3.09851	0.00428609	2.84019
Metabolism	map00950	Isoquinoline alkaloid biosynthesis	15	Chr10.g14144	1.13943	0.00428609	2.84019
Metabolism	map00950	Isoquinoline alkaloid biosynthesis	15	Chr10.g14121	2.3083	0.00428609	2.84019
Metabolism	map00950	Isoquinoline alkaloid biosynthesis	15	Chr10.g14146	11.6983	0.00428609	2.84019
Metabolism	map00950	Isoquinoline alkaloid biosynthesis	15	Scaffold2.g05484	-2.4991	0.00428609	2.84019
Metabolism	map00950	Isoquinoline alkaloid biosynthesis	15	Chr1.g58302	7.39596	0.00428609	2.84019
Metabolism	map00950	Isoquinoline alkaloid biosynthesis	15	Chr14.g49813	2.15402	0.00428609	2.84019
Metabolism	map00950	Isoquinoline alkaloid biosynthesis	15	Chr5.g06009	-2.93088	0.00428609	2.84019
Metabolism	map00950	Isoquinoline alkaloid biosynthesis	15	Chr6.g51470	2.34109	0.00428609	2.84019
Metabolism	map00950	Isoquinoline alkaloid biosynthesis	15	Chr16.g29629	2.84015	0.00428609	2.84019
Metabolism	map00950	Isoquinoline alkaloid biosynthesis	15	Chr17.g27255	2.7898	0.00428609	2.84019
Metabolism	map00950	Isoquinoline alkaloid biosynthesis	15	Chr5.g05994	1.23285	0.00428609	2.84019
Genetic Information Processing	map03008	Ribosome biogenesis in eukaryotes	40	Chr3.g19326	-1.17089	0.00492203	4.74342
Genetic Information Processing	map03008	Ribosome biogenesis in eukaryotes	40	Chr12.g36647	1.0848	0.00492203	4.74342
Genetic Information Processing	map03008	Ribosome biogenesis in eukaryotes	40	Chr12.g35234	1.2642	0.00492203	4.74342
Genetic Information Processing	map03008	Ribosome biogenesis in eukaryotes	40	Chr12.g35415	1.3369	0.00492203	4.74342
Genetic Information Processing	map03008	Ribosome biogenesis in eukaryotes	40	Chr9.g46691	1.12806	0.00492203	4.74342
Genetic Information Processing	map03008	Ribosome biogenesis in eukaryotes	40	Chr11.g09694	-1.7449	0.00492203	4.74342
Genetic Information Processing	map03008	Ribosome biogenesis in eukaryotes	40	Chr10.g16546	1.24428	0.00492203	4.74342
Genetic Information Processing	map03008	Ribosome biogenesis in eukaryotes	40	Chr2.g43923	7.00094	0.00492203	4.74342
Genetic Information Processing	map03008	Ribosome biogenesis in eukaryotes	40	Chr2.g43925	4.52727	0.00492203	4.74342
Genetic Information Processing	map03008	Ribosome biogenesis in eukaryotes	40	Chr2.g43924	5.40052	0.00492203	4.74342
Genetic Information Processing	map03008	Ribosome biogenesis in eukaryotes	40	Chr7.g33378	1.6958	0.00492203	4.74342
Genetic Information Processing	map03008	Ribosome biogenesis in eukaryotes	40	Chr5.g07411	1.19169	0.00492203	4.74342
Genetic Information Processing	map03008	Ribosome biogenesis in eukaryotes	40	Chr15.g03298	1.02837	0.00492203	4.74342
Genetic Information Processing	map03008	Ribosome biogenesis in eukaryotes	40	Chr13.g23005	4.39639	0.00492203	4.74342
Genetic Information Processing	map03008	Ribosome biogenesis in eukaryotes	40	Chr10.g15085	1.20723	0.00492203	4.74342
Genetic Information Processing	map03008	Ribosome biogenesis in eukaryotes	40	Chr5.g06807	-1.95613	0.00492203	4.74342
Genetic Information Processing	map03008	Ribosome biogenesis in eukaryotes	40	Chr5.g09103	1.1162	0.00492203	4.74342
Genetic Information Processing	map03008	Ribosome biogenesis in eukaryotes	40	Chr4.g40616	1.4235	0.00492203	4.74342
Genetic Information Processing	map03008	Ribosome biogenesis in eukaryotes	40	Chr17.g27677	2.17462	0.00492203	4.74342
Genetic Information Processing	map03008	Ribosome biogenesis in eukaryotes	40	Chr3.g17747	1.05817	0.00492203	4.74342
Genetic Information Processing	map03008	Ribosome biogenesis in eukaryotes	40	Chr11.g13255	2.06951	0.00492203	4.74342
Genetic Information Processing	map03008	Ribosome biogenesis in eukaryotes	40	Chr3.g20833	-3.11323	0.00492203	4.74342
Genetic Information Processing	map03008	Ribosome biogenesis in eukaryotes	40	Chr17.g26890	1.19788	0.00492203	4.74342
Genetic Information Processing	map03008	Ribosome biogenesis in eukaryotes	40	Chr16.g29081	1.07127	0.00492203	4.74342
Genetic Information Processing	map03008	Ribosome biogenesis in eukaryotes	40	Chr16.g28444	1.09376	0.00492203	4.74342
Genetic Information Processing	map03008	Ribosome biogenesis in eukaryotes	40	Chr6.g51046	1.5537	0.00492203	4.74342
Genetic Information Processing	map03008	Ribosome biogenesis in eukaryotes	40	Scaffold9.g34891	-2.60762	0.00492203	4.74342
Genetic Information Processing	map03008	Ribosome biogenesis in eukaryotes	40	Chr2.g42666	1.22407	0.00492203	4.74342
Genetic Information Processing	map03008	Ribosome biogenesis in eukaryotes	40	Chr1.g56655	1.6898	0.00492203	4.74342
Genetic Information Processing	map03008	Ribosome biogenesis in eukaryotes	40	Chr7.g31833	1.18058	0.00492203	4.74342
Genetic Information Processing	map03008	Ribosome biogenesis in eukaryotes	40	Scaffold2.g05319	6.61316	0.00492203	4.74342
Genetic Information Processing	map03008	Ribosome biogenesis in eukaryotes	40	Chr10.g17107	1.15428	0.00492203	4.74342
Genetic Information Processing	map03008	Ribosome biogenesis in eukaryotes	40	Chr10.g16899	1.48578	0.00492203	4.74342
Genetic Information Processing	map03008	Ribosome biogenesis in eukaryotes	40	Chr6.g51633	1.02134	0.00492203	4.74342
Genetic Information Processing	map03008	Ribosome biogenesis in eukaryotes	40	Chr17.g27736	3.40346	0.00492203	4.74342
Genetic Information Processing	map03008	Ribosome biogenesis in eukaryotes	40	Chr17.g27704	2.25591	0.00492203	4.74342
Genetic Information Processing	map03008	Ribosome biogenesis in eukaryotes	40	Chr6.g52994	1.46768	0.00492203	4.74342
Genetic Information Processing	map03008	Ribosome biogenesis in eukaryotes	40	Chr17.g27743	1.81042	0.00492203	4.74342
Genetic Information Processing	map03008	Ribosome biogenesis in eukaryotes	40	Chr10.g15365	1.18035	0.00492203	4.74342
Genetic Information Processing	map03008	Ribosome biogenesis in eukaryotes	40	Chr5.g07132	1.23698	0.00492203	4.74342
Metabolism	map00350	Tyrosine metabolism	19	Chr1.g58302	7.39596	0.00874685	2.06474
Metabolism	map00350	Tyrosine metabolism	19	Chr5.g06005	3.09851	0.00874685	2.06474
Metabolism	map00350	Tyrosine metabolism	19	Chr1.g58311	5.01325	0.00874685	2.06474
Metabolism	map00350	Tyrosine metabolism	19	Chr10.g17253	-1.40674	0.00874685	2.06474
Metabolism	map00350	Tyrosine metabolism	19	Chr10.g14148	1.76021	0.00874685	2.06474
Metabolism	map00350	Tyrosine metabolism	19	Chr1.g58312	6.65811	0.00874685	2.06474
Metabolism	map00350	Tyrosine metabolism	19	Chr10.g14144	1.13943	0.00874685	2.06474
Metabolism	map00350	Tyrosine metabolism	19	Chr10.g14121	2.3083	0.00874685	2.06474
Metabolism	map00350	Tyrosine metabolism	19	Chr10.g14146	11.6983	0.00874685	2.06474
Metabolism	map00350	Tyrosine metabolism	19	Scaffold2.g05484	-2.4991	0.00874685	2.06474
Metabolism	map00350	Tyrosine metabolism	19	Chr5.g06009	-2.93088	0.00874685	2.06474
Metabolism	map00350	Tyrosine metabolism	19	Chr14.g49813	2.15402	0.00874685	2.06474
Metabolism	map00350	Tyrosine metabolism	19	Chr10.g17254	-1.29051	0.00874685	2.06474
Metabolism	map00350	Tyrosine metabolism	19	Chr16.g29629	2.84015	0.00874685	2.06474
Metabolism	map00350	Tyrosine metabolism	19	Chr1.g56327	-1.26495	0.00874685	2.06474
Metabolism	map00350	Tyrosine metabolism	19	Chr17.g27255	2.7898	0.00874685	2.06474
Metabolism	map00350	Tyrosine metabolism	19	Chr6.g51470	2.34109	0.00874685	2.06474
Metabolism	map00350	Tyrosine metabolism	19	Chr10.g17249	1.28592	0.00874685	2.06474
Metabolism	map00350	Tyrosine metabolism	19	Chr5.g05994	1.23285	0.00874685	2.06474
Metabolism	map00910	Nitrogen metabolism	13	Chr2.g44117	-1.62151	0.020547	-0.83205
Metabolism	map00910	Nitrogen metabolism	13	Chr17.g24854	-1.36233	0.020547	-0.83205
Metabolism	map00910	Nitrogen metabolism	13	Chr11.g11869	-1.66827	0.020547	-0.83205
Metabolism	map00910	Nitrogen metabolism	13	Chr15.g01216	-1.82358	0.020547	-0.83205
Metabolism	map00910	Nitrogen metabolism	13	Chr10.g17179	-1.75148	0.020547	-0.83205
Metabolism	map00910	Nitrogen metabolism	13	Chr9.g44469	1.44937	0.020547	-0.83205
Metabolism	map00910	Nitrogen metabolism	13	Chr2.g41125	-2.24513	0.020547	-0.83205
Metabolism	map00910	Nitrogen metabolism	13	Chr8.g55792	1.0678	0.020547	-0.83205
Metabolism	map00910	Nitrogen metabolism	13	Chr1.g56962	1.76719	0.020547	-0.83205
Metabolism	map00910	Nitrogen metabolism	13	Chr13.g22786	-6.15015	0.020547	-0.83205
Metabolism	map00910	Nitrogen metabolism	13	Chr13.g23701	-1.43334	0.020547	-0.83205
Metabolism	map00910	Nitrogen metabolism	13	Chr7.g31710	1.43633	0.020547	-0.83205
Metabolism	map00910	Nitrogen metabolism	13	Chr11.g11126	5.51577	0.020547	-0.83205
Metabolism	map00860	Porphyrin and chlorophyll metabolism	15	Chr17.g27825	1.52036	0.0269262	3.87298
Metabolism	map00860	Porphyrin and chlorophyll metabolism	15	Chr9.g46503	2.34161	0.0269262	3.87298
Metabolism	map00860	Porphyrin and chlorophyll metabolism	15	Chr12.g37311	2.92265	0.0269262	3.87298
Metabolism	map00860	Porphyrin and chlorophyll metabolism	15	Chr12.g37310	2.71815	0.0269262	3.87298
Metabolism	map00860	Porphyrin and chlorophyll metabolism	15	Chr15.g01258	2.12708	0.0269262	3.87298
Metabolism	map00860	Porphyrin and chlorophyll metabolism	15	Chr17.g26020	4.50729	0.0269262	3.87298
Metabolism	map00860	Porphyrin and chlorophyll metabolism	15	Chr16.g31445	1.00226	0.0269262	3.87298
Metabolism	map00860	Porphyrin and chlorophyll metabolism	15	Chr8.g55875	1.21587	0.0269262	3.87298
Metabolism	map00860	Porphyrin and chlorophyll metabolism	15	Chr3.g18331	1.15379	0.0269262	3.87298
Metabolism	map00860	Porphyrin and chlorophyll metabolism	15	Chr15.g00535	1.72454	0.0269262	3.87298
Metabolism	map00860	Porphyrin and chlorophyll metabolism	15	Chr14.g48492	1.72797	0.0269262	3.87298
Metabolism	map00860	Porphyrin and chlorophyll metabolism	15	Chr14.g48867	2.76637	0.0269262	3.87298
Metabolism	map00860	Porphyrin and chlorophyll metabolism	15	Chr11.g12680	1.94434	0.0269262	3.87298
Metabolism	map00860	Porphyrin and chlorophyll metabolism	15	Chr15.g03201	1.3449	0.0269262	3.87298
Metabolism	map00860	Porphyrin and chlorophyll metabolism	15	Chr14.g49573	1.23714	0.0269262	3.87298
Metabolism	map00100	Steroid biosynthesis	14	Chr7.g33502	2.0312	0.0298175	0
Metabolism	map00100	Steroid biosynthesis	14	Chr5.g08158	1.39044	0.0298175	0
Metabolism	map00100	Steroid biosynthesis	14	Chr14.g48743	4.61483	0.0298175	0
Metabolism	map00100	Steroid biosynthesis	14	Chr2.g44017	-1.53398	0.0298175	0
Metabolism	map00100	Steroid biosynthesis	14	Chr17.g24710	1.40279	0.0298175	0
Metabolism	map00100	Steroid biosynthesis	14	Scaffold5.g20986	-1.22371	0.0298175	0
Metabolism	map00100	Steroid biosynthesis	14	Chr7.g32146	1.11617	0.0298175	0
Metabolism	map00100	Steroid biosynthesis	14	Chr7.g33531	2.8529	0.0298175	0
Metabolism	map00100	Steroid biosynthesis	14	Chr16.g29082	-2.74878	0.0298175	0
Metabolism	map00100	Steroid biosynthesis	14	Chr5.g06333	-1.34731	0.0298175	0
Metabolism	map00100	Steroid biosynthesis	14	Chr10.g16179	-1.07435	0.0298175	0
Metabolism	map00100	Steroid biosynthesis	14	Chr5.g08184	-6.02138	0.0298175	0
Metabolism	map00100	Steroid biosynthesis	14	Chr17.g27398	1.53389	0.0298175	0
Metabolism	map00100	Steroid biosynthesis	14	Chr2.g44149	-1.51183	0.0298175	0
Metabolism	map00941	Flavonoid biosynthesis	18	Chr16.g30429	1.12301	0.0311214	-3.77124
Metabolism	map00941	Flavonoid biosynthesis	18	Chr1.g57423	-1.30388	0.0311214	-3.77124
Metabolism	map00941	Flavonoid biosynthesis	18	Chr14.g50174	-1.13642	0.0311214	-3.77124
Metabolism	map00941	Flavonoid biosynthesis	18	Chr3.g20474	-1.11691	0.0311214	-3.77124
Metabolism	map00941	Flavonoid biosynthesis	18	Chr3.g20473	-1.30448	0.0311214	-3.77124
Metabolism	map00941	Flavonoid biosynthesis	18	Chr3.g20472	-1.12768	0.0311214	-3.77124
Metabolism	map00941	Flavonoid biosynthesis	18	Chr13.g21179	-1.02986	0.0311214	-3.77124
Metabolism	map00941	Flavonoid biosynthesis	18	Chr5.g05868	-1.97096	0.0311214	-3.77124
Metabolism	map00941	Flavonoid biosynthesis	18	Chr15.g02664	-1.62929	0.0311214	-3.77124
Metabolism	map00941	Flavonoid biosynthesis	18	Scaffold9.g34897	-2.53215	0.0311214	-3.77124
Metabolism	map00941	Flavonoid biosynthesis	18	Chr10.g15004	-6.47476	0.0311214	-3.77124
Metabolism	map00941	Flavonoid biosynthesis	18	Chr10.g13984	-1.68925	0.0311214	-3.77124
Metabolism	map00941	Flavonoid biosynthesis	18	Chr2.g42214	-1.42983	0.0311214	-3.77124
Metabolism	map00941	Flavonoid biosynthesis	18	Chr15.g04732	-1.53074	0.0311214	-3.77124
Metabolism	map00941	Flavonoid biosynthesis	18	Chr14.g48830	-2.79605	0.0311214	-3.77124
Metabolism	map00941	Flavonoid biosynthesis	18	Chr4.g38114	-1.72585	0.0311214	-3.77124
Metabolism	map00941	Flavonoid biosynthesis	18	Chr13.g21177	-2.04776	0.0311214	-3.77124
Metabolism	map00941	Flavonoid biosynthesis	18	Chr13.g23554	-3.44863	0.0311214	-3.77124
Organismal Systems	map04712	Circadian rhythm - plant	13	Chr1.g57450	1.59855	0.040775	1.94145
Organismal Systems	map04712	Circadian rhythm - plant	13	Chr1.g57684	3.70039	0.040775	1.94145
Organismal Systems	map04712	Circadian rhythm - plant	13	Chr10.g17084	1.46371	0.040775	1.94145
Organismal Systems	map04712	Circadian rhythm - plant	13	Chr1.g57707	1.55068	0.040775	1.94145
Organismal Systems	map04712	Circadian rhythm - plant	13	Chr4.g40318	1.04176	0.040775	1.94145
Organismal Systems	map04712	Circadian rhythm - plant	13	Chr12.g36406	1.09541	0.040775	1.94145
Organismal Systems	map04712	Circadian rhythm - plant	13	Chr7.g32671	1.99178	0.040775	1.94145
Organismal Systems	map04712	Circadian rhythm - plant	13	Chr13.g21179	-1.02986	0.040775	1.94145
Organismal Systems	map04712	Circadian rhythm - plant	13	Chr7.g31612	2.77331	0.040775	1.94145
Organismal Systems	map04712	Circadian rhythm - plant	13	Chr1.g56434	2.03007	0.040775	1.94145
Organismal Systems	map04712	Circadian rhythm - plant	13	Chr16.g31307	1.06248	0.040775	1.94145
Organismal Systems	map04712	Circadian rhythm - plant	13	Chr4.g38114	-1.72585	0.040775	1.94145
Organismal Systems	map04712	Circadian rhythm - plant	13	Chr13.g21177	-2.04776	0.040775	1.94145
Metabolism	map00906	Carotenoid biosynthesis	14	Scaffold14.g47558	-5.69122	0.0417483	0.534522
Metabolism	map00906	Carotenoid biosynthesis	14	Chr11.g09741	4.99771	0.0417483	0.534522
Metabolism	map00906	Carotenoid biosynthesis	14	Chr10.g15064	4.92242	0.0417483	0.534522
Metabolism	map00906	Carotenoid biosynthesis	14	Chr5.g06359	3.42181	0.0417483	0.534522
Metabolism	map00906	Carotenoid biosynthesis	14	Chr7.g31815	1.66318	0.0417483	0.534522
Metabolism	map00906	Carotenoid biosynthesis	14	Chr10.g14497	1.9673	0.0417483	0.534522
Metabolism	map00906	Carotenoid biosynthesis	14	Chr15.g04090	-6.35074	0.0417483	0.534522
Metabolism	map00906	Carotenoid biosynthesis	14	Chr5.g07013	4.28216	0.0417483	0.534522
Metabolism	map00906	Carotenoid biosynthesis	14	Chr8.g54496	2.26107	0.0417483	0.534522
Metabolism	map00906	Carotenoid biosynthesis	14	Chr11.g11731	-3.31068	0.0417483	0.534522
Metabolism	map00906	Carotenoid biosynthesis	14	Chr11.g11474	-1.67422	0.0417483	0.534522
Metabolism	map00906	Carotenoid biosynthesis	14	Chr3.g20140	1.85215	0.0417483	0.534522
Metabolism	map00906	Carotenoid biosynthesis	14	Chr15.g02994	-2.77117	0.0417483	0.534522
Metabolism	map00906	Carotenoid biosynthesis	14	Chr2.g43913	-3.67516	0.0417483	0.534522
Metabolism	map00360	Phenylalanine metabolism	14	Chr3.g19785	-2.6926	0.0485352	-1.06904
Metabolism	map00360	Phenylalanine metabolism	14	Chr1.g56350	-1.8692	0.0485352	-1.06904
Metabolism	map00360	Phenylalanine metabolism	14	Chr4.g39447	-2.08552	0.0485352	-1.06904
Metabolism	map00360	Phenylalanine metabolism	14	Chr11.g11145	-1.50441	0.0485352	-1.06904
Metabolism	map00360	Phenylalanine metabolism	14	Chr7.g31499	-1.75985	0.0485352	-1.06904
Metabolism	map00360	Phenylalanine metabolism	14	Chr3.g20473	-1.30448	0.0485352	-1.06904
Metabolism	map00360	Phenylalanine metabolism	14	Chr3.g20474	-1.11691	0.0485352	-1.06904
Metabolism	map00360	Phenylalanine metabolism	14	Scaffold2.g05484	-2.4991	0.0485352	-1.06904
Metabolism	map00360	Phenylalanine metabolism	14	Chr3.g20472	-1.12768	0.0485352	-1.06904
Metabolism	map00360	Phenylalanine metabolism	14	Chr14.g49813	2.15402	0.0485352	-1.06904
Metabolism	map00360	Phenylalanine metabolism	14	Chr6.g51470	2.34109	0.0485352	-1.06904
Metabolism	map00360	Phenylalanine metabolism	14	Chr17.g27255	2.7898	0.0485352	-1.06904
Metabolism	map00360	Phenylalanine metabolism	14	Chr14.g48180	1.99406	0.0485352	-1.06904
Metabolism	map00360	Phenylalanine metabolism	14	Chr16.g29629	2.84015	0.0485352	-1.06904
Organismal Systems	map04626	Plant-pathogen interaction	47	Chr1.g56628	-2.00605	0.0613312	-4.52181
Organismal Systems	map04626	Plant-pathogen interaction	47	Chr7.g31678	-6.31787	0.0613312	-4.52181
Organismal Systems	map04626	Plant-pathogen interaction	47	Chr14.g50093	-3.07302	0.0613312	-4.52181
Organismal Systems	map04626	Plant-pathogen interaction	47	Chr9.g46932	-1.8217	0.0613312	-4.52181
Organismal Systems	map04626	Plant-pathogen interaction	47	Chr6.g53231	-3.32177	0.0613312	-4.52181
Organismal Systems	map04626	Plant-pathogen interaction	47	Chr9.g47086	-5.49736	0.0613312	-4.52181
Organismal Systems	map04626	Plant-pathogen interaction	47	Chr17.g25061	-1.50209	0.0613312	-4.52181
Organismal Systems	map04626	Plant-pathogen interaction	47	Chr6.g51990	-1.91739	0.0613312	-4.52181
Organismal Systems	map04626	Plant-pathogen interaction	47	Chr7.g32106	-1.26581	0.0613312	-4.52181
Organismal Systems	map04626	Plant-pathogen interaction	47	Chr7.g32107	-1.17939	0.0613312	-4.52181
Organismal Systems	map04626	Plant-pathogen interaction	47	Chr1.g56835	-5.3119	0.0613312	-4.52181
Organismal Systems	map04626	Plant-pathogen interaction	47	Chr14.g48563	-1.41147	0.0613312	-4.52181
Organismal Systems	map04626	Plant-pathogen interaction	47	Chr16.g30964	1.03144	0.0613312	-4.52181
Organismal Systems	map04626	Plant-pathogen interaction	47	Chr5.g09359	-3.70039	0.0613312	-4.52181
Organismal Systems	map04626	Plant-pathogen interaction	47	Chr14.g48564	-4.24964	0.0613312	-4.52181
Organismal Systems	map04626	Plant-pathogen interaction	47	Chr2.g41766	-2.16659	0.0613312	-4.52181
Organismal Systems	map04626	Plant-pathogen interaction	47	Chr5.g06211	-4.23632	0.0613312	-4.52181
Organismal Systems	map04626	Plant-pathogen interaction	47	Chr1.g56530	-1.76676	0.0613312	-4.52181
Organismal Systems	map04626	Plant-pathogen interaction	47	Contig3.g09643	1.15618	0.0613312	-4.52181
Organismal Systems	map04626	Plant-pathogen interaction	47	Chr11.g09877	-2.2778	0.0613312	-4.52181
Organismal Systems	map04626	Plant-pathogen interaction	47	Chr11.g09881	-8.45067	0.0613312	-4.52181
Organismal Systems	map04626	Plant-pathogen interaction	47	Chr11.g10023	-1.0948	0.0613312	-4.52181
Organismal Systems	map04626	Plant-pathogen interaction	47	Chr16.g30043	1.2228	0.0613312	-4.52181
Organismal Systems	map04626	Plant-pathogen interaction	47	Chr11.g09897	-3.59214	0.0613312	-4.52181
Organismal Systems	map04626	Plant-pathogen interaction	47	Chr11.g09892	-5.32431	0.0613312	-4.52181
Organismal Systems	map04626	Plant-pathogen interaction	47	Chr1.g56840	-6.79795	0.0613312	-4.52181
Organismal Systems	map04626	Plant-pathogen interaction	47	Chr1.g56492	-5.64537	0.0613312	-4.52181
Organismal Systems	map04626	Plant-pathogen interaction	47	Chr1.g56493	-2.14527	0.0613312	-4.52181
Organismal Systems	map04626	Plant-pathogen interaction	47	Chr8.g54334	-1.26944	0.0613312	-4.52181
Organismal Systems	map04626	Plant-pathogen interaction	47	Chr12.g34978	1.00632	0.0613312	-4.52181
Organismal Systems	map04626	Plant-pathogen interaction	47	Chr8.g54331	-1.01898	0.0613312	-4.52181
Organismal Systems	map04626	Plant-pathogen interaction	47	Chr7.g31672	-2.42986	0.0613312	-4.52181
Organismal Systems	map04626	Plant-pathogen interaction	47	Chr6.g52244	-1.17924	0.0613312	-4.52181
Organismal Systems	map04626	Plant-pathogen interaction	47	Chr14.g49980	-1.30931	0.0613312	-4.52181
Organismal Systems	map04626	Plant-pathogen interaction	47	Chr7.g31682	-2.84895	0.0613312	-4.52181
Organismal Systems	map04626	Plant-pathogen interaction	47	Chr7.g32015	2.02064	0.0613312	-4.52181
Organismal Systems	map04626	Plant-pathogen interaction	47	Chr6.g51565	-1.54856	0.0613312	-4.52181
Organismal Systems	map04626	Plant-pathogen interaction	47	Chr14.g50188	-3.72712	0.0613312	-4.52181
Organismal Systems	map04626	Plant-pathogen interaction	47	Chr6.g50746	-1.19112	0.0613312	-4.52181
Organismal Systems	map04626	Plant-pathogen interaction	47	Chr3.g18885	-1.25108	0.0613312	-4.52181
Organismal Systems	map04626	Plant-pathogen interaction	47	Chr2.g41719	2.26202	0.0613312	-4.52181
Organismal Systems	map04626	Plant-pathogen interaction	47	Chr1.g56837	-5.819	0.0613312	-4.52181
Organismal Systems	map04626	Plant-pathogen interaction	47	Contig44.g59341	1.74834	0.0613312	-4.52181
Organismal Systems	map04626	Plant-pathogen interaction	47	Chr11.g09880	-8.28884	0.0613312	-4.52181
Organismal Systems	map04626	Plant-pathogen interaction	47	Chr9.g46833	1.31998	0.0613312	-4.52181
Organismal Systems	map04626	Plant-pathogen interaction	47	Chr1.g56838	-4.64903	0.0613312	-4.52181
Organismal Systems	map04626	Plant-pathogen interaction	47	Chr1.g56529	-7.46768	0.0613312	-4.52181
Metabolism	map00905	Brassinosteroid biosynthesis	9	Chr15.g03263	-1.52662	0.124969	-2.33333
Metabolism	map00905	Brassinosteroid biosynthesis	9	Chr7.g32362	-1.66695	0.124969	-2.33333
Metabolism	map00905	Brassinosteroid biosynthesis	9	Chr2.g42275	-1.09472	0.124969	-2.33333
Metabolism	map00905	Brassinosteroid biosynthesis	9	Chr16.g30940	-1.743	0.124969	-2.33333
Metabolism	map00905	Brassinosteroid biosynthesis	9	Chr16.g30929	2.77993	0.124969	-2.33333
Metabolism	map00905	Brassinosteroid biosynthesis	9	Chr13.g24284	-1.76049	0.124969	-2.33333
Metabolism	map00905	Brassinosteroid biosynthesis	9	Chr6.g51621	-2.08702	0.124969	-2.33333
Metabolism	map00905	Brassinosteroid biosynthesis	9	Chr7.g32342	-1.31741	0.124969	-2.33333
Metabolism	map00905	Brassinosteroid biosynthesis	9	Chr2.g41430	-1.15258	0.124969	-2.33333
Metabolism	map00960	Tropane, piperidine and pyridine alkaloid biosynthesis	9	Chr1.g57279	1.19789	0.124969	1
Metabolism	map00960	Tropane, piperidine and pyridine alkaloid biosynthesis	9	Scaffold2.g05484	-2.4991	0.124969	1
Metabolism	map00960	Tropane, piperidine and pyridine alkaloid biosynthesis	9	Chr14.g49813	2.15402	0.124969	1
Metabolism	map00960	Tropane, piperidine and pyridine alkaloid biosynthesis	9	Chr4.g39851	1.13225	0.124969	1
Metabolism	map00960	Tropane, piperidine and pyridine alkaloid biosynthesis	9	Chr6.g51470	2.34109	0.124969	1
Metabolism	map00960	Tropane, piperidine and pyridine alkaloid biosynthesis	9	Chr11.g10594	-1.66111	0.124969	1
Metabolism	map00960	Tropane, piperidine and pyridine alkaloid biosynthesis	9	Chr11.g10593	-1.4821	0.124969	1
Metabolism	map00960	Tropane, piperidine and pyridine alkaloid biosynthesis	9	Chr17.g27255	2.7898	0.124969	1
Metabolism	map00960	Tropane, piperidine and pyridine alkaloid biosynthesis	9	Chr16.g29629	2.84015	0.124969	1
Metabolism	map00740	Riboflavin metabolism	6	Chr13.g24445	-2.10537	0.184819	-0.816497
Metabolism	map00740	Riboflavin metabolism	6	Chr3.g20012	-1.48011	0.184819	-0.816497
Metabolism	map00740	Riboflavin metabolism	6	Chr15.g03642	1.35105	0.184819	-0.816497
Metabolism	map00740	Riboflavin metabolism	6	Chr12.g34970	-6.1525	0.184819	-0.816497
Metabolism	map00740	Riboflavin metabolism	6	Chr6.g50773	-1.09911	0.184819	-0.816497
Metabolism	map00740	Riboflavin metabolism	6	Chr16.g28751	1.51647	0.184819	-0.816497
Metabolism	map00904	Diterpenoid biosynthesis	9	Chr2.g42937	1.61452	0.187827	1
Metabolism	map00904	Diterpenoid biosynthesis	9	Chr2.g43669	-1.49158	0.187827	1
Metabolism	map00904	Diterpenoid biosynthesis	9	Chr10.g15442	1.41187	0.187827	1
Metabolism	map00904	Diterpenoid biosynthesis	9	Chr10.g15441	3.28296	0.187827	1
Metabolism	map00904	Diterpenoid biosynthesis	9	Chr1.g56784	1.47213	0.187827	1
Metabolism	map00904	Diterpenoid biosynthesis	9	Chr15.g04608	1.6034	0.187827	1
Metabolism	map00904	Diterpenoid biosynthesis	9	Chr10.g14486	-2.05381	0.187827	1
Metabolism	map00904	Diterpenoid biosynthesis	9	Chr8.g53950	3.11295	0.187827	1
Metabolism	map00904	Diterpenoid biosynthesis	9	Chr9.g46599	-4.34355	0.187827	1
Environmental Information Processing	map04075	Plant hormone signal transduction	60	Chr16.g30452	-1.56073	0.189478	1.29099
Environmental Information Processing	map04075	Plant hormone signal transduction	60	Scaffold5.g20895	2.78516	0.189478	1.29099
Environmental Information Processing	map04075	Plant hormone signal transduction	60	Scaffold7.g27918	-1.47553	0.189478	1.29099
Environmental Information Processing	map04075	Plant hormone signal transduction	60	Chr4.g40318	1.04176	0.189478	1.29099
Environmental Information Processing	map04075	Plant hormone signal transduction	60	Chr16.g30829	-1.87447	0.189478	1.29099
Environmental Information Processing	map04075	Plant hormone signal transduction	60	Chr1.g57278	1.2811	0.189478	1.29099
Environmental Information Processing	map04075	Plant hormone signal transduction	60	Chr16.g28599	-2.62457	0.189478	1.29099
Environmental Information Processing	map04075	Plant hormone signal transduction	60	Chr16.g28598	-2.66849	0.189478	1.29099
Environmental Information Processing	map04075	Plant hormone signal transduction	60	Chr15.g04194	1.07269	0.189478	1.29099
Environmental Information Processing	map04075	Plant hormone signal transduction	60	Chr6.g52956	1.10046	0.189478	1.29099
Environmental Information Processing	map04075	Plant hormone signal transduction	60	Chr8.g54486	1.18716	0.189478	1.29099
Environmental Information Processing	map04075	Plant hormone signal transduction	60	Chr7.g32491	1.76397	0.189478	1.29099
Environmental Information Processing	map04075	Plant hormone signal transduction	60	Chr10.g15082	-1.01376	0.189478	1.29099
Environmental Information Processing	map04075	Plant hormone signal transduction	60	Chr7.g32216	2.42695	0.189478	1.29099
Environmental Information Processing	map04075	Plant hormone signal transduction	60	Chr5.g08464	1.17556	0.189478	1.29099
Environmental Information Processing	map04075	Plant hormone signal transduction	60	Chr7.g31705	2.62586	0.189478	1.29099
Environmental Information Processing	map04075	Plant hormone signal transduction	60	Chr12.g35904	-1.80813	0.189478	1.29099
Environmental Information Processing	map04075	Plant hormone signal transduction	60	Chr5.g06875	1.35543	0.189478	1.29099
Environmental Information Processing	map04075	Plant hormone signal transduction	60	Chr12.g35285	1.58734	0.189478	1.29099
Environmental Information Processing	map04075	Plant hormone signal transduction	60	Chr6.g51986	-3.90183	0.189478	1.29099
Environmental Information Processing	map04075	Plant hormone signal transduction	60	Chr5.g09006	1.47755	0.189478	1.29099
Environmental Information Processing	map04075	Plant hormone signal transduction	60	Chr13.g23381	1.8213	0.189478	1.29099
Environmental Information Processing	map04075	Plant hormone signal transduction	60	Chr3.g19746	1.1912	0.189478	1.29099
Environmental Information Processing	map04075	Plant hormone signal transduction	60	Chr7.g33909	1.28537	0.189478	1.29099
Environmental Information Processing	map04075	Plant hormone signal transduction	60	Contig21.g58869	-4.8457	0.189478	1.29099
Environmental Information Processing	map04075	Plant hormone signal transduction	60	Chr9.g45417	1.40378	0.189478	1.29099
Environmental Information Processing	map04075	Plant hormone signal transduction	60	Chr2.g42689	3.55441	0.189478	1.29099
Environmental Information Processing	map04075	Plant hormone signal transduction	60	Chr16.g31048	1.33354	0.189478	1.29099
Environmental Information Processing	map04075	Plant hormone signal transduction	60	Chr5.g07032	-1.21661	0.189478	1.29099
Environmental Information Processing	map04075	Plant hormone signal transduction	60	Contig21.g58870	2.07914	0.189478	1.29099
Environmental Information Processing	map04075	Plant hormone signal transduction	60	Chr10.g16796	1.2	0.189478	1.29099
Environmental Information Processing	map04075	Plant hormone signal transduction	60	Chr12.g37160	1.20028	0.189478	1.29099
Environmental Information Processing	map04075	Plant hormone signal transduction	60	Chr13.g24159	2.96399	0.189478	1.29099
Environmental Information Processing	map04075	Plant hormone signal transduction	60	Chr4.g40133	-2.92278	0.189478	1.29099
Environmental Information Processing	map04075	Plant hormone signal transduction	60	Chr5.g07031	-3.38363	0.189478	1.29099
Environmental Information Processing	map04075	Plant hormone signal transduction	60	Chr10.g15903	1.38492	0.189478	1.29099
Environmental Information Processing	map04075	Plant hormone signal transduction	60	Chr13.g22558	-1.50661	0.189478	1.29099
Environmental Information Processing	map04075	Plant hormone signal transduction	60	Chr15.g04236	1.59739	0.189478	1.29099
Environmental Information Processing	map04075	Plant hormone signal transduction	60	Chr3.g20208	-1.33425	0.189478	1.29099
Environmental Information Processing	map04075	Plant hormone signal transduction	60	Chr5.g06618	-1.28603	0.189478	1.29099
Environmental Information Processing	map04075	Plant hormone signal transduction	60	Contig65.g59476	2.78516	0.189478	1.29099
Environmental Information Processing	map04075	Plant hormone signal transduction	60	Chr13.g22553	-1.69088	0.189478	1.29099
Environmental Information Processing	map04075	Plant hormone signal transduction	60	Chr1.g56499	2.72585	0.189478	1.29099
Environmental Information Processing	map04075	Plant hormone signal transduction	60	Chr15.g03362	-1.34063	0.189478	1.29099
Environmental Information Processing	map04075	Plant hormone signal transduction	60	Chr1.g57793	1.13133	0.189478	1.29099
Environmental Information Processing	map04075	Plant hormone signal transduction	60	Chr11.g10470	-1.70142	0.189478	1.29099
Environmental Information Processing	map04075	Plant hormone signal transduction	60	Chr6.g51459	1.80297	0.189478	1.29099
Environmental Information Processing	map04075	Plant hormone signal transduction	60	Chr9.g45715	1.19193	0.189478	1.29099
Environmental Information Processing	map04075	Plant hormone signal transduction	60	Chr11.g10474	-1.50232	0.189478	1.29099
Environmental Information Processing	map04075	Plant hormone signal transduction	60	Chr17.g26720	-1.05614	0.189478	1.29099
Environmental Information Processing	map04075	Plant hormone signal transduction	60	Chr8.g54436	1.13862	0.189478	1.29099
Environmental Information Processing	map04075	Plant hormone signal transduction	60	Contig30.g59205	-1.94404	0.189478	1.29099
Environmental Information Processing	map04075	Plant hormone signal transduction	60	Chr6.g51327	1.05273	0.189478	1.29099
Environmental Information Processing	map04075	Plant hormone signal transduction	60	Chr11.g13248	-1.31554	0.189478	1.29099
Environmental Information Processing	map04075	Plant hormone signal transduction	60	Chr11.g13326	-1.34686	0.189478	1.29099
Environmental Information Processing	map04075	Plant hormone signal transduction	60	Chr11.g11132	3.67077	0.189478	1.29099
Environmental Information Processing	map04075	Plant hormone signal transduction	60	Chr1.g56446	-2.18688	0.189478	1.29099
Environmental Information Processing	map04075	Plant hormone signal transduction	60	Chr15.g01277	1.26024	0.189478	1.29099
Environmental Information Processing	map04075	Plant hormone signal transduction	60	Chr16.g31282	2.14459	0.189478	1.29099
Environmental Information Processing	map04075	Plant hormone signal transduction	60	Chr7.g34090	-1.23251	0.189478	1.29099
Genetic Information Processing	map03430	Mismatch repair	16	Chr11.g10452	1.87178	0.191185	0
Genetic Information Processing	map03430	Mismatch repair	16	Chr12.g37098	-6.40239	0.191185	0
Genetic Information Processing	map03430	Mismatch repair	16	Chr5.g05621	-2.14642	0.191185	0
Genetic Information Processing	map03430	Mismatch repair	16	Chr15.g03949	1.49362	0.191185	0
Genetic Information Processing	map03430	Mismatch repair	16	Chr7.g34102	-1.21583	0.191185	0
Genetic Information Processing	map03430	Mismatch repair	16	Chr10.g14412	2.07978	0.191185	0
Genetic Information Processing	map03430	Mismatch repair	16	Chr4.g40134	-5.48976	0.191185	0
Genetic Information Processing	map03430	Mismatch repair	16	Chr14.g50195	2.0728	0.191185	0
Genetic Information Processing	map03430	Mismatch repair	16	Contig2.g05590	-2.17836	0.191185	0
Genetic Information Processing	map03430	Mismatch repair	16	Chr15.g02953	1.01761	0.191185	0
Genetic Information Processing	map03430	Mismatch repair	16	Chr5.g08871	-5.46041	0.191185	0
Genetic Information Processing	map03430	Mismatch repair	16	Chr5.g05761	-2.41267	0.191185	0
Genetic Information Processing	map03430	Mismatch repair	16	Chr11.g10517	2.72489	0.191185	0
Genetic Information Processing	map03430	Mismatch repair	16	Chr6.g51107	1.95918	0.191185	0
Genetic Information Processing	map03430	Mismatch repair	16	Chr14.g50271	2.46281	0.191185	0
Genetic Information Processing	map03430	Mismatch repair	16	Chr13.g24548	-2.79782	0.191185	0

## Sheet: Table S5
category	ID	term	count	genes	logFC	adj_pval	zscore
Metabolism	map00190	Oxidative phosphorylation	8	SCAFFOLD23.G58950	-2.37811	0.0330381	-2.82843
Metabolism	map00190	Oxidative phosphorylation	8	CONTIG45.G59348	-2.20924	0.0330381	-2.82843
Metabolism	map00190	Oxidative phosphorylation	8	SCAFFOLD26.G59074	-1.85793	0.0330381	-2.82843
Metabolism	map00190	Oxidative phosphorylation	8	SCAFFOLD23.G58958	-1.65555	0.0330381	-2.82843
Metabolism	map00190	Oxidative phosphorylation	8	CHR8.G54863	-1.40727	0.0330381	-2.82843
Metabolism	map00190	Oxidative phosphorylation	8	CHR3.G18476	-2.18668	0.0330381	-2.82843
Metabolism	map00190	Oxidative phosphorylation	8	CHR8.G54877	-2.13613	0.0330381	-2.82843
Metabolism	map00190	Oxidative phosphorylation	8	CHR9.G45516	-6.79708	0.0330381	-2.82843
Metabolism	map00073	Cutin, suberine and wax biosynthesis	4	CHR10.G16709	3.79458	0.0415491	-1
Metabolism	map00073	Cutin, suberine and wax biosynthesis	4	CHR7.G34065	-1.99887	0.0415491	-1
Metabolism	map00073	Cutin, suberine and wax biosynthesis	4	CHR11.G11338	-1.25968	0.0415491	-1
Metabolism	map00073	Cutin, suberine and wax biosynthesis	4	CHR2.G43262	-7.83393	0.0415491	-1
Metabolism	map00950	Isoquinoline alkaloid biosynthesis	4	CHR10.G14144	-2.13715	0.0489006	-2
Metabolism	map00950	Isoquinoline alkaloid biosynthesis	4	CHR5.G06006	-1.06183	0.0489006	-2
Metabolism	map00950	Isoquinoline alkaloid biosynthesis	4	CHR10.G14121	-1.08819	0.0489006	-2
Metabolism	map00950	Isoquinoline alkaloid biosynthesis	4	CHR5.G05994	-1.03482	0.0489006	-2
Metabolism	map00195	Photosynthesis	4	SCAFFOLD23.G58950	-2.37811	0.0717611	-2
Metabolism	map00195	Photosynthesis	4	CHR5.G06421	-1.59069	0.0717611	-2
Metabolism	map00195	Photosynthesis	4	SCAFFOLD23.G58947	-2.25706	0.0717611	-2
Metabolism	map00195	Photosynthesis	4	SCAFFOLD23.G58958	-1.65555	0.0717611	-2
Metabolism	map00350	Tyrosine metabolism	4	CHR10.G14144	-2.13715	0.101062	-2
Metabolism	map00350	Tyrosine metabolism	4	CHR5.G06006	-1.06183	0.101062	-2
Metabolism	map00350	Tyrosine metabolism	4	CHR10.G14121	-1.08819	0.101062	-2
Metabolism	map00350	Tyrosine metabolism	4	CHR5.G05994	-1.03482	0.101062	-2
Metabolism	map00901	Indole alkaloid biosynthesis	2	CHR5.G06175	-1.47034	0.122791	-1.41421
Metabolism	map00901	Indole alkaloid biosynthesis	2	CHR5.G06173	-1.63024	0.122791	-1.41421
Metabolism	map00945	Stilbenoid, diarylheptanoid and gingerol biosynthesis	3	CHR1.G58121	-6.70271	0.257018	-1.73205
Metabolism	map00945	Stilbenoid, diarylheptanoid and gingerol biosynthesis	3	CHR1.G58124	-6.28669	0.257018	-1.73205
Metabolism	map00945	Stilbenoid, diarylheptanoid and gingerol biosynthesis	3	CHR1.G58134	-4.40433	0.257018	-1.73205
Metabolism	map00460	Cyanoamino acid metabolism	4	CHR14.G49671	1.37617	0.273309	1
Metabolism	map00460	Cyanoamino acid metabolism	4	CHR14.G47648	1.37524	0.273309	1
Metabolism	map00460	Cyanoamino acid metabolism	4	CHR3.G20301	1.47865	0.273309	1
Metabolism	map00460	Cyanoamino acid metabolism	4	CHR17.G27275	-1.16883	0.273309	1
Metabolism	map00604	Glycosphingolipid biosynthesis - ganglio series	1	CHR1.G57395	1.06216	0.286066	1
Metabolism	map00040	Pentose and glucuronate interconversions	5	CHR2.G43703	-1.93837	0.286251	-2.23607
Metabolism	map00040	Pentose and glucuronate interconversions	5	CHR1.G56757	-1.14113	0.286251	-2.23607
Metabolism	map00040	Pentose and glucuronate interconversions	5	CHR2.G41925	-1.58864	0.286251	-2.23607
Metabolism	map00040	Pentose and glucuronate interconversions	5	CHR1.G56758	-1.33489	0.286251	-2.23607
Metabolism	map00040	Pentose and glucuronate interconversions	5	CHR7.G31958	-1.42888	0.286251	-2.23607
Metabolism	map00909	Sesquiterpenoid and triterpenoid biosynthesis	2	CHR10.G13985	1.42899	0.326415	1.41421
Metabolism	map00909	Sesquiterpenoid and triterpenoid biosynthesis	2	CHR5.G08163	1.38162	0.326415	1.41421
Metabolism	map00051	Fructose and mannose metabolism	3	CHR1.G56757	-1.14113	0.343527	-1.73205
Metabolism	map00051	Fructose and mannose metabolism	3	CHR1.G56758	-1.33489	0.343527	-1.73205
Metabolism	map00051	Fructose and mannose metabolism	3	CHR7.G31958	-1.42888	0.343527	-1.73205
Metabolism	map00400	Phenylalanine, tyrosine and tryptophan biosynthesis	3	SCAFFOLD2.G05336	-1.34487	0.350805	-1.73205
Metabolism	map00400	Phenylalanine, tyrosine and tryptophan biosynthesis	3	CHR11.G10387	-2.17868	0.350805	-1.73205
Metabolism	map00400	Phenylalanine, tyrosine and tryptophan biosynthesis	3	CHR4.G39070	-1.01994	0.350805	-1.73205
Genetic Information Processing	map03440	Homologous recombination	3	CHR5.G08906	1.878	0.416275	1.73205
Genetic Information Processing	map03440	Homologous recombination	3	CHR7.G33862	2.0004	0.416275	1.73205
Genetic Information Processing	map03440	Homologous recombination	3	CHR6.G51404	1.06954	0.416275	1.73205
Genetic Information Processing	map03410	Base excision repair	2	CHR11.G11355	1.6729	0.419365	0
Genetic Information Processing	map03410	Base excision repair	2	CHR6.G50753	-6.01179	0.419365	0
Organismal Systems	map04626	Plant-pathogen interaction	6	CHR3.G18867	1.36366	0.423524	2.44949
Organismal Systems	map04626	Plant-pathogen interaction	6	CHR15.G00302	2.19726	0.423524	2.44949
Organismal Systems	map04626	Plant-pathogen interaction	6	CHR7.G32015	2.07984	0.423524	2.44949
Organismal Systems	map04626	Plant-pathogen interaction	6	CHR3.G18827	1.63139	0.423524	2.44949
Organismal Systems	map04626	Plant-pathogen interaction	6	CHR3.G18885	1.38065	0.423524	2.44949
Organismal Systems	map04626	Plant-pathogen interaction	6	CHR3.G18842	2.71228	0.423524	2.44949
Metabolism	map00603	Glycosphingolipid biosynthesis - globo and isoglobo series	1	CHR1.G57395	1.06216	0.426461	1
Metabolism	map00531	Glycosaminoglycan degradation	1	CHR1.G57395	1.06216	0.427367	1
Metabolism	map00940	Phenylpropanoid biosynthesis	6	CHR14.G47648	1.37524	0.429692	1.63299
Metabolism	map00940	Phenylpropanoid biosynthesis	6	CHR3.G20301	1.47865	0.429692	1.63299
Metabolism	map00940	Phenylpropanoid biosynthesis	6	CHR17.G27275	-1.16883	0.429692	1.63299
Metabolism	map00940	Phenylpropanoid biosynthesis	6	CHR15.G04872	2.35517	0.429692	1.63299
Metabolism	map00940	Phenylpropanoid biosynthesis	6	CHR13.G22854	4.71221	0.429692	1.63299
Metabolism	map00940	Phenylpropanoid biosynthesis	6	CHR14.G49671	1.37617	0.429692	1.63299
Metabolism	map00410	beta-Alanine metabolism	2	CONTIG27.G59107	1.86476	0.433016	0
Metabolism	map00410	beta-Alanine metabolism	2	CHR6.G51374	-2.18995	0.433016	0

## Sheet: Table S6
table 1 Key gene information identified through screening
groups	ko_name	gene_ids	function	regulate
antenna-photosystem supercomplex proteins	LHCA3	Chr17.g25854	photosystem I chlorophyll a/b-binding protein	up
	LHCA4	Chr14.g50095	photosystem I chlorophyll a/b-binding protein	up
	LHCB1	Chr10.g14455,Chr10.g14454,Chr17.g27784,Chr5.g06308,Chr17.g26035,Chr5.g06309,Chr17.g26034,Chr9.g44287	chlorophyll a-b binding protein of LHCII type 1-like	up
	LHCB2	Chr9.g46287	chlorophyll a-b binding protein 151	up
	LHCB3	Chr11.g12614,Contig22.g58910,Chr3.g18379	chlorophyll a-b binding protein 13	up
	LHCB4	Chr12.g36001	chlorophyll a-b binding protein CP29.1	up
	LHCB6	Chr15.g00321,Chr8.g56009	chlorophyll a-b binding protein CP24	up
	psaK	Chr5.g06421	photosystem I reaction center subunit psaK	up
	psaO	Contig89.g59550	photosystem I subunit O-like	up
	psbP	Chr16.g28185,Chr8.g54955	psbP domain-containing protein	down
	Seps2	Chr15.g01501	stress enhanced protein 2	down
	PsbX	Chr15.g04487	photosystem II protein	down
chloroplast movement proteins	KIF14	Scaffold2.g05249,Chr15.g01844	chloroplast accumulation movement	up/down
	WEB	Chr11.g09852,Chr11.g09942	WEB family protein	up
	MEP	Chr4.g40777	Protein kinase domain-containing protein	up
cyclic electron transport proteins	NDH	Chr14.g50098,Chr6.g51193,Chr4.g39250,Chr13.g22850,Chr7.g32604,Chr1.g57384,Chr3.g18453	NADH dehydrogenase	down
	PGR5	Scaffold9.g34913	PGR5-like protein	down
anthocyanin-flavonoid biosynthesis proteins	ANR	Chr10.g13984, Chr5.g05868	anthocyanidin reductase	down
	ANS	Scaffold9.g34897	anthocyanidin synthase	down
	CHS	Chr13.g21177,Chr4.g38114,Chr13.g21179	chalcone synthase	down
	CYP73A	Chr3.g20473,Chr3.g20474,Chr3.g20472	cinnamate 4-hydroxylase 3	down
	CYP75B1	Chr14.g50174	flavonoid 3'-monooxygenase	down
	DFR	Chr15.g04732	dihydroflavonol reductase	down
	HCT	Chr14.g48830,Chr10.g15004,Chr16.g30429,Chr13.g23554	deacetylvindoline O-acetyltransferase-like	down
	CHI	Chr1.g57423	chalcone isomerase	down
	F3H	Chr15.g02664,Chr2.g42214	flavanone 3-hydroxylase	down
carotenoid biosynthesis proteins	AAO3	Chr11.g11731,Scaffold14.g47558	abscisic-aldehyde oxidase	down
	ABA2	Chr2.g43913	xanthoxin dehydrogenase	down
	CCD8	Chr15.g04090	carlactone synthase	down
	CCS1	Chr11.g11474	capsanthin/capsorubin synthase	down
	lcyE, crtL2	Chr15.g02994	lycopene epsilon cyclase	down
	crtB	Chr11.g09741	phytoene synthase	up
	crtZ	Chr7.g31815	beta-carotene hydroxylase	up
	CYP707A	Chr3.g20140,Chr8.g54496	abscisic acid 8'-hydroxylase	up
	NCED	Chr5.g06359,Chr10.g14497,Chr10.g15064,Chr5.g07013	9-cis-epoxycarotenoid dioxygenase NCED3	up
chloroplast transporter proteins	SLC25A23S	Chr4.g40031	methyltransferase activity	up
porphyrin and chlorophyll metabolism proteins	bchM, chlM	Chr14.g49573	magnesium protoporphyrin IX methyltransferase	up
	CAO	Chr15.g01258	chlorophyllide a oxygenase	up
	chlH, bchH	Chr12.g37310,Chr14.g48492,Chr12.g37311	magnesium-chelatase subunit ChlH	up
	FXN	Chr9.g46503	frataxin	up
	hemA	Chr8.g55875,Chr14.g48867,Chr15.g00535,Chr17.g26020	glutamyl-tRNA reductase	up
	hemC, HMBS	Chr16.g31445	porphobilinogen deaminase	up
	NOL, NYC1	Chr15.g03201	chlorophyll(ide) b reductase NYC1	up
	por	Chr3.g18331,Chr11.g12680	protochlorophyllide reductase	up
	PPOX, hemY	Chr17.g27825	protoporphyrinogen oxidase 1	up
other pigment metabolic proteins	RNase T2	Chr13.g23892	extracellular ribonuclease LE-like	down
	APRT, apt	Chr6.g52687	adenine phosphoribosyltransferase 3-like	up
	PPO	Chr10.g14148,Chr10.g14146,Chr5.g05994,Chr10.g14121,Chr5.g06005,Chr10.g14144	polyphenol oxidase	up
	MDH2	Chr6.g51206	malate dehydrogenase	up

## Sheet: Table S7
TF.gene.id	Target.gene.id	Cor	tf_family	TF_domain_description	target_KO_id	target_KO_name	target_NR_hit-name	target_NR_description	source
Chr1.g57872	Chr14.g49573	0.808786	bZIP	bZIP transcription factor	K03428	bchM, chlM	XP_009339056.2	PREDICTED: magnesium protoporphyrin IX methyltransferase, chloroplastic-like [Pyrus x bretschneideri]	pigment
Chr7.g31760	Chr14.g49573	0.817117	ERF	AP2 domain	K03428	bchM, chlM	XP_009339056.2	PREDICTED: magnesium protoporphyrin IX methyltransferase, chloroplastic-like [Pyrus x bretschneideri]	pigment
Chr7.g33113	Chr14.g49573	-0.800563	bZIP	bZIP transcription factor	K03428	bchM, chlM	XP_009339056.2	PREDICTED: magnesium protoporphyrin IX methyltransferase, chloroplastic-like [Pyrus x bretschneideri]	pigment
Chr1.g57872	Chr15.g01258	0.842805	bZIP	bZIP transcription factor	K13600	CAO	RXH75991.1	hypothetical protein DVH24_042778 [Malus domestica]	pigment
Chr12.g36415	Chr15.g01258	0.923378	MYB_related	Myb-like DNA-binding domain	K13600	CAO	RXH75991.1	hypothetical protein DVH24_042778 [Malus domestica]	pigment
Chr13.g22994	Chr15.g01258	-0.835227	ERF	AP2 domain	K13600	CAO	RXH75991.1	hypothetical protein DVH24_042778 [Malus domestica]	pigment
Chr14.g50091	Chr15.g01258	0.980358	Dof	Dof domain, zinc finger	K13600	CAO	RXH75991.1	hypothetical protein DVH24_042778 [Malus domestica]	pigment
Chr4.g39597	Chr15.g01258	0.941672	MYB_related	Myb-like DNA-binding domain	K13600	CAO	RXH75991.1	hypothetical protein DVH24_042778 [Malus domestica]	pigment
Chr4.g38799	Chr15.g04090	0.900078	HSF	HSF-type DNA-binding	K17913	CCD8	XP_009367455.1	PREDICTED: carotenoid cleavage dioxygenase 8 homolog B, chloroplastic [Pyrus x bretschneideri]	pigment
Chr1.g57019	Chr11.g11474	0.816147	WRKY	WRKY DNA -binding domain	K14593	CCS1	XP_009374976.1	PREDICTED: capsanthin/capsorubin synthase, chromoplastic-like [Pyrus x bretschneideri]	pigment
Chr2.g42549	Chr11.g11474	-0.872283	MYB_related	Myb-like DNA-binding domain	K14593	CCS1	XP_009374976.1	PREDICTED: capsanthin/capsorubin synthase, chromoplastic-like [Pyrus x bretschneideri]	pigment
Chr4.g38799	Chr11.g11474	0.831983	HSF	HSF-type DNA-binding	K14593	CCS1	XP_009374976.1	PREDICTED: capsanthin/capsorubin synthase, chromoplastic-like [Pyrus x bretschneideri]	pigment
Chr12.g36415	Chr12.g37310	0.912085	MYB_related	Myb-like DNA-binding domain	K03403	chlH, bchH	XP_009349888.1	PREDICTED: magnesium-chelatase subunit ChlH, chloroplastic-like [Pyrus x bretschneideri]	pigment
Chr12.g36415	Chr14.g48492	0.93294	MYB_related	Myb-like DNA-binding domain	K03403	chlH, bchH	XP_009355491.1	PREDICTED: magnesium-chelatase subunit ChlH, chloroplastic-like [Pyrus x bretschneideri]	pigment
Chr12.g36415	Chr12.g37311	0.940772	MYB_related	Myb-like DNA-binding domain	K03403	chlH, bchH	XP_009341213.1	PREDICTED: magnesium-chelatase subunit ChlH, chloroplastic [Pyrus x bretschneideri]	pigment
Chr14.g50091	Chr14.g48492	0.934331	Dof	Dof domain, zinc finger	K03403	chlH, bchH	XP_009355491.1	PREDICTED: magnesium-chelatase subunit ChlH, chloroplastic-like [Pyrus x bretschneideri]	pigment
Chr14.g50091	Chr12.g37310	0.939646	Dof	Dof domain, zinc finger	K03403	chlH, bchH	XP_009349888.1	PREDICTED: magnesium-chelatase subunit ChlH, chloroplastic-like [Pyrus x bretschneideri]	pigment
Chr14.g50091	Chr12.g37311	0.943626	Dof	Dof domain, zinc finger	K03403	chlH, bchH	XP_009341213.1	PREDICTED: magnesium-chelatase subunit ChlH, chloroplastic [Pyrus x bretschneideri]	pigment
Chr3.g20467	Chr12.g37311	0.858039	bZIP	bZIP transcription factor	K03403	chlH, bchH	XP_009341213.1	PREDICTED: magnesium-chelatase subunit ChlH, chloroplastic [Pyrus x bretschneideri]	pigment
Chr4.g38799	Chr12.g37311	-0.906929	HSF	HSF-type DNA-binding	K03403	chlH, bchH	XP_009341213.1	PREDICTED: magnesium-chelatase subunit ChlH, chloroplastic [Pyrus x bretschneideri]	pigment
Chr4.g38799	Chr14.g48492	-0.866572	HSF	HSF-type DNA-binding	K03403	chlH, bchH	XP_009355491.1	PREDICTED: magnesium-chelatase subunit ChlH, chloroplastic-like [Pyrus x bretschneideri]	pigment
Chr4.g39597	Chr12.g37310	0.919159	MYB_related	Myb-like DNA-binding domain	K03403	chlH, bchH	XP_009349888.1	PREDICTED: magnesium-chelatase subunit ChlH, chloroplastic-like [Pyrus x bretschneideri]	pigment
Chr4.g39597	Chr14.g48492	0.937913	MYB_related	Myb-like DNA-binding domain	K03403	chlH, bchH	XP_009355491.1	PREDICTED: magnesium-chelatase subunit ChlH, chloroplastic-like [Pyrus x bretschneideri]	pigment
Chr4.g39597	Chr12.g37311	0.946266	MYB_related	Myb-like DNA-binding domain	K03403	chlH, bchH	XP_009341213.1	PREDICTED: magnesium-chelatase subunit ChlH, chloroplastic [Pyrus x bretschneideri]	pigment
Chr10.g14329	Chr11.g09741	0.860726	Dof	Dof domain, zinc finger	K02291	crtB	XP_009364165.1	PREDICTED: phytoene synthase 2, chloroplastic-like [Pyrus x bretschneideri]	pigment
Chr15.g04678	Chr11.g09741	0.919339	C2H2	Zinc finger, C2H2 type	K02291	crtB	XP_009364165.1	PREDICTED: phytoene synthase 2, chloroplastic-like [Pyrus x bretschneideri]	pigment
Chr4.g40318	Chr11.g09741	0.893518	bHLH	Helix-loop-helix DNA-binding domain	K02291	crtB	XP_009364165.1	PREDICTED: phytoene synthase 2, chloroplastic-like [Pyrus x bretschneideri]	pigment
Chr6.g52143	Chr3.g20140	0.847672	ERF	AP2 domain	K09843	CYP707A	XP_009364364.1	PREDICTED: abscisic acid 8'-hydroxylase 2 [Pyrus x bretschneideri]	pigment
Chr1.g56765	Chr3.g20474	-0.844353	TCP	TCP family transcription factor	K00487	CYP73A	AXQ71082.1	cinnamate 4-hydroxylase 3 [Pyrus x bretschneideri]	pigment
Chr16.g30002	Chr3.g20474	-0.817229	CAMTA	CG-1 domain	K00487	CYP73A	AXQ71082.1	cinnamate 4-hydroxylase 3 [Pyrus x bretschneideri]	pigment
Chr12.g37426	Chr2.g42214	-0.803813	bHLH	Helix-loop-helix DNA-binding domain	K00475	F3H	AAX89399.1	flavanon 3 beta-hydroxylase [Pyrus communis]	pigment
Chr14.g50091	Chr9.g46503	0.942188	Dof	Dof domain, zinc finger	K19054	FXN	XP_009353224.1	PREDICTED: frataxin, mitochondrial-like isoform X1 [Pyrus x bretschneideri]	pigment
Chr15.g02218	Chr13.g23554	0.833274	MYB	Myb-like DNA-binding domain	K13065	HCT	RXH79833.1	hypothetical protein DVH24_040980 [Malus domestica]	pigment
Chr13.g22994	Chr14.g48867	-0.831267	ERF	AP2 domain	K02492	hemA	RXH92547.1	hypothetical protein DVH24_033443 [Malus domestica]	pigment
Chr14.g50091	Chr15.g00535	0.947665	Dof	Dof domain, zinc finger	K02492	hemA	XP_009366392.1	PREDICTED: glutamyl-tRNA reductase 1, chloroplastic-like [Pyrus x bretschneideri]	pigment
Chr16.g28381	Chr17.g26020	0.806744	bZIP	bZIP transcription factor	K02492	hemA	RXH73830.1	hypothetical protein DVH24_016652 [Malus domestica]	pigment
Chr7.g33103	Chr17.g26020	0.828638	bZIP	bZIP transcription factor	K02492	hemA	RXH73830.1	hypothetical protein DVH24_016652 [Malus domestica]	pigment
Chr8.g53825	Chr15.g01844	0.851627	ZF-HD	ZF-HD protein dimerisation region		KIF14	XP_009345710.1	PREDICTED: kinesin-like protein KCA2 [Pyrus x bretschneideri]	chloroplast
Chr2.g42549	Chr15.g02994	-0.808161	MYB_related	Myb-like DNA-binding domain	K06444	lcyE, crtL2	XP_009361642.1	PREDICTED: lycopene epsilon cyclase, chloroplastic [Pyrus x bretschneideri]	pigment
Chr12.g36415	Chr17.g25854	0.81867	MYB_related	Myb-like DNA-binding domain	K08909	LHCA3	XP_008342284.1	photosystem I chlorophyll a/b-binding protein 3-1, chloroplastic [Malus domestica]	chloroplast
Chr4.g39597	Chr17.g25854	0.894836	MYB_related	Myb-like DNA-binding domain	K08909	LHCA3	XP_008342284.1	photosystem I chlorophyll a/b-binding protein 3-1, chloroplastic [Malus domestica]	chloroplast
Chr5.g08464	Chr17.g25854	0.810217	bZIP	bZIP transcription factor	K08909	LHCA3	XP_008342284.1	photosystem I chlorophyll a/b-binding protein 3-1, chloroplastic [Malus domestica]	chloroplast
Chr1.g57872	Chr14.g50095	0.900867	bZIP	bZIP transcription factor	K08910	LHCA4	XP_009339094.1	PREDICTED: chlorophyll a-b binding protein P4, chloroplastic [Pyrus x bretschneideri]	chloroplast
Chr14.g48363	Chr14.g50095	0.826287	bHLH	Helix-loop-helix DNA-binding domain	K08910	LHCA4	XP_009339094.1	PREDICTED: chlorophyll a-b binding protein P4, chloroplastic [Pyrus x bretschneideri]	chloroplast
Chr14.g50091	Chr14.g50095	0.855103	Dof	Dof domain, zinc finger	K08910	LHCA4	XP_009339094.1	PREDICTED: chlorophyll a-b binding protein P4, chloroplastic [Pyrus x bretschneideri]	chloroplast
Chr1.g56765	Chr17.g27784	0.844215	TCP	TCP family transcription factor	K08912	LHCB1	XP_008362557.2	chlorophyll a-b binding protein of LHCII type 1-like [Malus domestica]	chloroplast
Chr1.g56765	Chr9.g44287	0.854444	TCP	TCP family transcription factor	K08912	LHCB1	XP_008362557.2	chlorophyll a-b binding protein of LHCII type 1-like [Malus domestica]	chloroplast
Chr1.g57872	Chr10.g14455	0.825353	bZIP	bZIP transcription factor	K08912	LHCB1	XP_008371583.2	chlorophyll a-b binding protein of LHCII type 1-like [Malus domestica]	chloroplast
Chr12.g36415	Chr10.g14455	0.808426	MYB_related	Myb-like DNA-binding domain	K08912	LHCB1	XP_008371583.2	chlorophyll a-b binding protein of LHCII type 1-like [Malus domestica]	chloroplast
Chr12.g36415	Chr5.g06309	0.883633	MYB_related	Myb-like DNA-binding domain	K08912	LHCB1	XP_008371583.2	chlorophyll a-b binding protein of LHCII type 1-like [Malus domestica]	chloroplast
Chr12.g36415	Chr5.g06308	0.924311	MYB_related	Myb-like DNA-binding domain	K08912	LHCB1	XP_008371583.2	chlorophyll a-b binding protein of LHCII type 1-like [Malus domestica]	chloroplast
Chr15.g03192	Chr9.g44287	0.848555	HSF	HSF-type DNA-binding	K08912	LHCB1	XP_008362557.2	chlorophyll a-b binding protein of LHCII type 1-like [Malus domestica]	chloroplast
Chr15.g04678	Chr9.g44287	0.805452	C2H2	Zinc finger, C2H2 type	K08912	LHCB1	XP_008362557.2	chlorophyll a-b binding protein of LHCII type 1-like [Malus domestica]	chloroplast
Chr4.g39317	Chr5.g06309	-0.809169	MYB	Myb-like DNA-binding domain	K08912	LHCB1	XP_008371583.2	chlorophyll a-b binding protein of LHCII type 1-like [Malus domestica]	chloroplast
Chr4.g39597	Chr10.g14454	0.824889	MYB_related	Myb-like DNA-binding domain	K08912	LHCB1	XP_008356026.1	chlorophyll a-b binding protein of LHCII type 1 [Malus domestica]	chloroplast
Chr4.g39597	Chr10.g14455	0.865804	MYB_related	Myb-like DNA-binding domain	K08912	LHCB1	XP_008371583.2	chlorophyll a-b binding protein of LHCII type 1-like [Malus domestica]	chloroplast
Chr4.g39597	Chr5.g06309	0.927544	MYB_related	Myb-like DNA-binding domain	K08912	LHCB1	XP_008371583.2	chlorophyll a-b binding protein of LHCII type 1-like [Malus domestica]	chloroplast
Chr4.g39597	Chr5.g06308	0.965124	MYB_related	Myb-like DNA-binding domain	K08912	LHCB1	XP_008371583.2	chlorophyll a-b binding protein of LHCII type 1-like [Malus domestica]	chloroplast
Chr8.g53885	Chr5.g06308	-0.807711	C2H2	Zinc finger, C2H2 type	K08912	LHCB1	XP_008371583.2	chlorophyll a-b binding protein of LHCII type 1-like [Malus domestica]	chloroplast
Chr9.g46658	Chr17.g27784	0.827347	TCP	TCP family transcription factor	K08912	LHCB1	XP_008362557.2	chlorophyll a-b binding protein of LHCII type 1-like [Malus domestica]	chloroplast
Chr9.g46658	Chr9.g44287	0.848875	TCP	TCP family transcription factor	K08912	LHCB1	XP_008362557.2	chlorophyll a-b binding protein of LHCII type 1-like [Malus domestica]	chloroplast
Chr14.g50091	Chr9.g46287	0.925369	Dof	Dof domain, zinc finger	K08913	LHCB2	XP_009365212.1	PREDICTED: chlorophyll a-b binding protein 151, chloroplastic-like [Pyrus x bretschneideri]	chloroplast
Chr1.g57872	Contig22.g58910	0.802348	bZIP	bZIP transcription factor	K08914	LHCB3	XP_009342455.1	PREDICTED: chlorophyll a-b binding protein 13, chloroplastic [Pyrus x bretschneideri]	chloroplast
Chr1.g57872	Chr3.g18379	0.885671	bZIP	bZIP transcription factor	K08914	LHCB3	XP_008366442.1	chlorophyll a-b binding protein 13, chloroplastic [Malus domestica]	chloroplast
Chr14.g50091	Chr11.g12614	0.83751	Dof	Dof domain, zinc finger	K08914	LHCB3	XP_009342455.1	PREDICTED: chlorophyll a-b binding protein 13, chloroplastic [Pyrus x bretschneideri]	chloroplast
Chr14.g50091	Contig22.g58910	0.893158	Dof	Dof domain, zinc finger	K08914	LHCB3	XP_009342455.1	PREDICTED: chlorophyll a-b binding protein 13, chloroplastic [Pyrus x bretschneideri]	chloroplast
Chr14.g50091	Chr8.g56009	0.85944	Dof	Dof domain, zinc finger	K08917	LHCB6	XP_008391511.1	chlorophyll a-b binding protein CP24 10A, chloroplastic [Malus domestica]	chloroplast
Chr4.g39597	Chr8.g56009	0.806076	MYB_related	Myb-like DNA-binding domain	K08917	LHCB6	XP_008391511.1	chlorophyll a-b binding protein CP24 10A, chloroplastic [Malus domestica]	chloroplast
Chr5.g07056	Chr15.g00321	-0.806484	bHLH	Helix-loop-helix DNA-binding domain	K08917	LHCB6	XP_009362479.1	PREDICTED: chlorophyll a-b binding protein CP24 10A, chloroplastic-like [Pyrus x bretschneideri]	chloroplast
Chr7.g31760	Chr15.g00321	0.844034	ERF	AP2 domain	K08917	LHCB6	XP_009362479.1	PREDICTED: chlorophyll a-b binding protein CP24 10A, chloroplastic-like [Pyrus x bretschneideri]	chloroplast
Chr12.g36415	Chr6.g51206	0.872426	MYB_related	Myb-like DNA-binding domain	K00026	MDH2	XP_008374550.1	malate dehydrogenase, chloroplastic [Malus domestica]	pigment
Chr14.g50091	Chr6.g51206	0.903627	Dof	Dof domain, zinc finger	K00026	MDH2	XP_008374550.1	malate dehydrogenase, chloroplastic [Malus domestica]	pigment
Chr4.g38799	Chr6.g51206	-0.802856	HSF	HSF-type DNA-binding	K00026	MDH2	XP_008374550.1	malate dehydrogenase, chloroplastic [Malus domestica]	pigment
Chr4.g39597	Chr6.g51206	0.893637	MYB_related	Myb-like DNA-binding domain	K00026	MDH2	XP_008374550.1	malate dehydrogenase, chloroplastic [Malus domestica]	pigment
Chr10.g14399	Chr10.g14497	0.839354	MIKC	SRF-type transcription factor (DNA-binding and dimerisation domain)	K09840	NCED	QBZ28531.1	9-cis-epoxycarotenoid dioxygenase [Pyrus x bretschneideri x Pyrus pyrifolia]	pigment
Chr8.g55567	Chr10.g15064	0.873788	ERF	AP2 domain	K09840	NCED	AJO53636.1	9-cis-epoxycarotenoid dioxygenase 1 [Pyrus pyrifolia]	pigment
Chr15.g02218	Chr14.g50098	0.897026	MYB	Myb-like DNA-binding domain		NDH	XP_008393172.1	photosynthetic NDH subunit of subcomplex B 4, chloroplastic-like [Malus domestica]	chloroplast
Chr2.g42549	Chr6.g51193	-0.813387	MYB_related	Myb-like DNA-binding domain		NDH	XP_008374560.1	photosynthetic NDH subunit of subcomplex B 4, chloroplastic-like [Malus domestica]	chloroplast
Chr14.g48363	Chr13.g22850	-0.808091	bHLH	Helix-loop-helix DNA-binding domain	K03952	NDUFA8	XP_018502069.1	PREDICTED: NADH dehydrogenase [ubiquinone] 1 alpha subcomplex subunit 8-B-like [Pyrus x bretschneideri]	chloroplast
Chr12.g36415	Chr15.g03201	0.819753	MYB_related	Myb-like DNA-binding domain	K13606	NOL, NYC1	XP_009374020.1	PREDICTED: probable chlorophyll	pigment
Chr14.g50091	Chr15.g03201	0.929926	Dof	Dof domain, zinc finger	K13606	NOL, NYC1	XP_009374020.1	PREDICTED: probable chlorophyll	pigment
Chr4.g38799	Chr15.g03201	-0.818339	HSF	HSF-type DNA-binding	K13606	NOL, NYC1	XP_009374020.1	PREDICTED: probable chlorophyll	pigment
Chr4.g39597	Chr15.g03201	0.868036	MYB_related	Myb-like DNA-binding domain	K13606	NOL, NYC1	XP_009374020.1	PREDICTED: probable chlorophyll	pigment
Chr5.g08464	Chr15.g03201	0.810198	bZIP	bZIP transcription factor	K13606	NOL, NYC1	XP_009374020.1	PREDICTED: probable chlorophyll	pigment
Chr1.g56765	Chr11.g12680	0.93099	TCP	TCP family transcription factor	K00218	por	XP_009378484.1	PREDICTED: protochlorophyllide reductase, chloroplastic [Pyrus x bretschneideri]	pigment
Chr10.g14329	Chr11.g12680	0.841402	Dof	Dof domain, zinc finger	K00218	por	XP_009378484.1	PREDICTED: protochlorophyllide reductase, chloroplastic [Pyrus x bretschneideri]	pigment
Chr16.g28381	Chr11.g12680	0.866267	bZIP	bZIP transcription factor	K00218	por	XP_009378484.1	PREDICTED: protochlorophyllide reductase, chloroplastic [Pyrus x bretschneideri]	pigment
Chr2.g42549	Chr3.g18331	0.844902	MYB_related	Myb-like DNA-binding domain	K00218	por	XP_009343573.1	PREDICTED: protochlorophyllide reductase, chloroplastic [Pyrus x bretschneideri]	pigment
Chr4.g38859	Chr11.g12680	0.81743	TCP	TCP family transcription factor	K00218	por	XP_009378484.1	PREDICTED: protochlorophyllide reductase, chloroplastic [Pyrus x bretschneideri]	pigment
Chr8.g54677	Chr11.g12680	0.839214	GATA	GATA zinc finger	K00218	por	XP_009378484.1	PREDICTED: protochlorophyllide reductase, chloroplastic [Pyrus x bretschneideri]	pigment
Chr9.g46658	Chr11.g12680	0.859811	TCP	TCP family transcription factor	K00218	por	XP_009378484.1	PREDICTED: protochlorophyllide reductase, chloroplastic [Pyrus x bretschneideri]	pigment
Chr1.g56765	Chr5.g05994	0.831335	TCP	TCP family transcription factor	K00422	PPO	ADF59058.2	polyphenol oxidase IV [Pyrus x bretschneideri]	pigment
Chr1.g56765	Chr5.g06005	0.909796	TCP	TCP family transcription factor	K00422	PPO	XP_009334541.1	PREDICTED: polyphenol oxidase, chloroplastic-like isoform X1 [Pyrus x bretschneideri]	pigment
Chr1.g56765	Chr10.g14148	0.941049	TCP	TCP family transcription factor	K00422	PPO	ADF59060.1	polyphenol oxidase 6 precursor [Pyrus x bretschneideri]	pigment
Chr10.g14329	Chr5.g05994	0.809429	Dof	Dof domain, zinc finger	K00422	PPO	ADF59058.2	polyphenol oxidase IV [Pyrus x bretschneideri]	pigment
Chr10.g14329	Chr10.g14121	0.851075	Dof	Dof domain, zinc finger	K00422	PPO	XP_009334541.1	PREDICTED: polyphenol oxidase, chloroplastic-like isoform X1 [Pyrus x bretschneideri]	pigment
Chr10.g14329	Chr10.g14148	0.860913	Dof	Dof domain, zinc finger	K00422	PPO	ADF59060.1	polyphenol oxidase 6 precursor [Pyrus x bretschneideri]	pigment
Chr10.g14399	Chr10.g14146	0.805388	MIKC	SRF-type transcription factor (DNA-binding and dimerisation domain)	K00422	PPO	ADF59060.1	polyphenol oxidase 6 precursor [Pyrus x bretschneideri]	pigment
Chr12.g35175	Chr10.g14146	0.85326	bZIP	bZIP transcription factor	K00422	PPO	ADF59060.1	polyphenol oxidase 6 precursor [Pyrus x bretschneideri]	pigment
Chr13.g23117	Chr10.g14148	0.898776	CAMTA	CG-1 domain	K00422	PPO	ADF59060.1	polyphenol oxidase 6 precursor [Pyrus x bretschneideri]	pigment
Chr15.g02261	Chr10.g14148	0.801862	bHLH	Helix-loop-helix DNA-binding domain	K00422	PPO	ADF59060.1	polyphenol oxidase 6 precursor [Pyrus x bretschneideri]	pigment
Chr15.g02261	Chr5.g05994	0.880313	bHLH	Helix-loop-helix DNA-binding domain	K00422	PPO	ADF59058.2	polyphenol oxidase IV [Pyrus x bretschneideri]	pigment
Chr15.g03053	Chr10.g14146	0.855713	MYB_related	Myb-like DNA-binding domain	K00422	PPO	ADF59060.1	polyphenol oxidase 6 precursor [Pyrus x bretschneideri]	pigment
Chr15.g04678	Chr5.g05994	0.871146	C2H2	Zinc finger, C2H2 type	K00422	PPO	ADF59058.2	polyphenol oxidase IV [Pyrus x bretschneideri]	pigment
Chr15.g04678	Chr10.g14121	0.943434	C2H2	Zinc finger, C2H2 type	K00422	PPO	XP_009334541.1	PREDICTED: polyphenol oxidase, chloroplastic-like isoform X1 [Pyrus x bretschneideri]	pigment
Chr16.g28381	Chr5.g06005	0.889659	bZIP	bZIP transcription factor	K00422	PPO	XP_009334541.1	PREDICTED: polyphenol oxidase, chloroplastic-like isoform X1 [Pyrus x bretschneideri]	pigment
Chr16.g30002	Chr10.g14148	0.867555	CAMTA	CG-1 domain	K00422	PPO	ADF59060.1	polyphenol oxidase 6 precursor [Pyrus x bretschneideri]	pigment
Chr2.g42355	Chr10.g14148	0.865514	ZF-HD	ZF-HD protein dimerisation region	K00422	PPO	ADF59060.1	polyphenol oxidase 6 precursor [Pyrus x bretschneideri]	pigment
Chr2.g42355	Chr5.g05994	0.868423	ZF-HD	ZF-HD protein dimerisation region	K00422	PPO	ADF59058.2	polyphenol oxidase IV [Pyrus x bretschneideri]	pigment
Chr4.g38859	Chr10.g14148	0.876311	TCP	TCP family transcription factor	K00422	PPO	ADF59060.1	polyphenol oxidase 6 precursor [Pyrus x bretschneideri]	pigment
Chr4.g38859	Chr5.g05994	0.903599	TCP	TCP family transcription factor	K00422	PPO	ADF59058.2	polyphenol oxidase IV [Pyrus x bretschneideri]	pigment
Chr4.g40318	Chr10.g14121	0.868125	bHLH	Helix-loop-helix DNA-binding domain	K00422	PPO	XP_009334541.1	PREDICTED: polyphenol oxidase, chloroplastic-like isoform X1 [Pyrus x bretschneideri]	pigment
Chr4.g40318	Chr10.g14148	0.89021	bHLH	Helix-loop-helix DNA-binding domain	K00422	PPO	ADF59060.1	polyphenol oxidase 6 precursor [Pyrus x bretschneideri]	pigment
Chr7.g31966	Chr5.g05994	0.813976	TCP	TCP family transcription factor	K00422	PPO	ADF59058.2	polyphenol oxidase IV [Pyrus x bretschneideri]	pigment
Chr7.g31966	Chr10.g14148	0.888115	TCP	TCP family transcription factor	K00422	PPO	ADF59060.1	polyphenol oxidase 6 precursor [Pyrus x bretschneideri]	pigment
Chr7.g33103	Chr5.g06005	0.891828	bZIP	bZIP transcription factor	K00422	PPO	XP_009334541.1	PREDICTED: polyphenol oxidase, chloroplastic-like isoform X1 [Pyrus x bretschneideri]	pigment
Chr7.g33754	Chr10.g14121	0.830992	SBP	SBP domain	K00422	PPO	XP_009334541.1	PREDICTED: polyphenol oxidase, chloroplastic-like isoform X1 [Pyrus x bretschneideri]	pigment
Chr7.g33754	Chr5.g05994	0.848665	SBP	SBP domain	K00422	PPO	ADF59058.2	polyphenol oxidase IV [Pyrus x bretschneideri]	pigment
Chr8.g54677	Chr5.g06005	0.858563	GATA	GATA zinc finger	K00422	PPO	XP_009334541.1	PREDICTED: polyphenol oxidase, chloroplastic-like isoform X1 [Pyrus x bretschneideri]	pigment
Chr9.g46658	Chr5.g06005	0.875376	TCP	TCP family transcription factor	K00422	PPO	XP_009334541.1	PREDICTED: polyphenol oxidase, chloroplastic-like isoform X1 [Pyrus x bretschneideri]	pigment
Chr15.g03053	Chr5.g06421	0.843447	MYB_related	Myb-like DNA-binding domain	K02698	psaK	XP_009362260.1	PREDICTED: photosystem I reaction center subunit psaK, chloroplastic-like [Pyrus x bretschneideri]	chloroplast
Chr2.g41701	Chr5.g06421	0.888389	MYB_related	Myb-like DNA-binding domain	K02698	psaK	XP_009362260.1	PREDICTED: photosystem I reaction center subunit psaK, chloroplastic-like [Pyrus x bretschneideri]	chloroplast
Chr17.g24904	Chr1.g57384	0.813134	HB-other	Homeobox domain	K02717	psbP	XP_028956759.1	photosynthetic NDH subunit of lumenal location 1, chloroplastic-like [Malus domestica]	chloroplast
Chr2.g42549	Chr1.g57384	-0.904824	MYB_related	Myb-like DNA-binding domain	K02717	psbP	XP_028956759.1	photosynthetic NDH subunit of lumenal location 1, chloroplastic-like [Malus domestica]	chloroplast
Chr1.g57019	Chr3.g18453	0.805019	WRKY	WRKY DNA -binding domain	K08901	psbQ	XP_009358084.1	PREDICTED: photosynthetic NDH subunit of lumenal location 3, chloroplastic-like [Pyrus x bretschneideri]	chloroplast
Chr17.g24904	Chr3.g18453	0.893692	HB-other	Homeobox domain	K08901	psbQ	XP_009358084.1	PREDICTED: photosynthetic NDH subunit of lumenal location 3, chloroplastic-like [Pyrus x bretschneideri]	chloroplast
Chr2.g42549	Chr3.g18453	-0.829925	MYB_related	Myb-like DNA-binding domain	K08901	psbQ	XP_009358084.1	PREDICTED: photosynthetic NDH subunit of lumenal location 3, chloroplastic-like [Pyrus x bretschneideri]	chloroplast
Chr13.g23850	Chr4.g40031	0.804437	MYB	Myb-like DNA-binding domain	K14684	SLC25A23S	RXH81787.1	hypothetical protein DVH24_036128 [Malus domestica]	chloroplast
Chr10.g14329	Chr11.g09852	0.811199	Dof	Dof domain, zinc finger		WEB	XP_009349139.1	PREDICTED: WEB family protein At5g55860-like [Pyrus x bretschneideri]	chloroplast
Chr13.g23431	Chr11.g09852	0.843003	MIKC	SRF-type transcription factor (DNA-binding and dimerisation domain)		WEB	XP_009349139.1	PREDICTED: WEB family protein At5g55860-like [Pyrus x bretschneideri]	chloroplast
Chr15.g02261	Chr11.g09852	0.809729	bHLH	Helix-loop-helix DNA-binding domain		WEB	XP_009349139.1	PREDICTED: WEB family protein At5g55860-like [Pyrus x bretschneideri]	chloroplast
Chr15.g04678	Chr11.g09942	0.823977	C2H2	Zinc finger, C2H2 type		WEB	XP_009367224.1	PREDICTED: WEB family protein At5g55860-like [Pyrus x bretschneideri]	chloroplast
Chr15.g04678	Chr11.g09852	0.847003	C2H2	Zinc finger, C2H2 type		WEB	XP_009349139.1	PREDICTED: WEB family protein At5g55860-like [Pyrus x bretschneideri]	chloroplast
Chr16.g28381	Chr11.g09852	0.852746	bZIP	bZIP transcription factor		WEB	XP_009349139.1	PREDICTED: WEB family protein At5g55860-like [Pyrus x bretschneideri]	chloroplast
Chr16.g28381	Chr11.g09942	0.904613	bZIP	bZIP transcription factor		WEB	XP_009367224.1	PREDICTED: WEB family protein At5g55860-like [Pyrus x bretschneideri]	chloroplast
Chr7.g33103	Chr11.g09942	0.879226	bZIP	bZIP transcription factor		WEB	XP_009367224.1	PREDICTED: WEB family protein At5g55860-like [Pyrus x bretschneideri]	chloroplast
Chr8.g55567	Chr11.g09942	0.800767	ERF	AP2 domain		WEB	XP_009367224.1	PREDICTED: WEB family protein At5g55860-like [Pyrus x bretschneideri]	chloroplast
Chr9.g46658	Chr11.g09852	0.8523	TCP	TCP family transcription factor		WEB	XP_009349139.1	PREDICTED: WEB family protein At5g55860-like [Pyrus x bretschneideri]	chloroplast

## Sheet: Table S8
TF.gene.id	tf_family	target_gene_number
Chr14.g50091	Dof	13
Chr4.g39597	MYB_related	12
Chr12.g36415	MYB_related	10
Chr1.g56765	TCP	7
Chr1.g57872	bZIP	6
Chr10.g14329	Dof	6
Chr15.g04678	C2H2	6
Chr2.g42549	MYB_related	6
Chr4.g38799	HSF	6
Chr16.g28381	bZIP	5
Chr9.g46658	TCP	5
Chr15.g02261	bHLH	3
Chr4.g38859	TCP	3
Chr4.g40318	bHLH	3
Chr7.g33103	bZIP	3
Chr1.g57019	WRKY	2
Chr10.g14399	MIKC	2
Chr13.g22994	ERF	2
Chr14.g48363	bHLH	2
Chr15.g02218	MYB	2
Chr15.g03053	MYB_related	2
Chr16.g30002	CAMTA	2
Chr17.g24904	HB-other	2
Chr2.g42355	ZF-HD	2
Chr5.g08464	bZIP	2
Chr7.g31760	ERF	2
Chr7.g31966	TCP	2
Chr7.g33754	SBP	2
Chr8.g54677	GATA	2
Chr8.g55567	ERF	2
Chr12.g35175	bZIP	1
Chr12.g37426	bHLH	1
Chr13.g23117	CAMTA	1
Chr13.g23431	MIKC	1
Chr13.g23850	MYB	1
Chr15.g03192	HSF	1
Chr2.g41701	MYB_related	1
Chr3.g20467	bZIP	1
Chr4.g39317	MYB	1
Chr5.g07056	bHLH	1
Chr6.g52143	ERF	1
Chr7.g33113	bZIP	1
Chr8.g53825	ZF-HD	1
Chr8.g53885	C2H2	1
